# Supplementary material for: How do patients with end-stage ankle arthritis decide between two surgical treatments? A qualitative study
Source: PubMed Central journal article supplement — BMJ Open. 2013 Jul 16;3(7):e002782. doi: 10.1136/bmjopen-2013-002782 (PMC3717458; doi:10.1136/bmjopen-2013-002782), 2013-07-16
Supplement: bmjopen-2013-002782.draft_revisions.pdf [file bmjopen-2013-002782.draft_revisions.pdf]

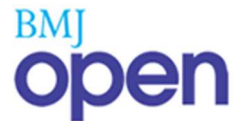

## How do patients make decisions about which surgical treatment to undergo? A Qualitative Study

|                                 |                                                                                                                                                                                                                                                                                                                                                                   |
|---------------------------------|-------------------------------------------------------------------------------------------------------------------------------------------------------------------------------------------------------------------------------------------------------------------------------------------------------------------------------------------------------------------|
| Journal:                        | <i>BMJ Open</i>                                                                                                                                                                                                                                                                                                                                                   |
| Manuscript ID:                  | bmjopen-2013-002782                                                                                                                                                                                                                                                                                                                                               |
| Article Type:                   | Research                                                                                                                                                                                                                                                                                                                                                          |
| Date Submitted by the Author:   | 24-Feb-2013                                                                                                                                                                                                                                                                                                                                                       |
| Complete List of Authors:       | Zaidi, Razi; UCL , Institute of Orthopaedics and Musculoskeletal Science<br>Pfeil, Michael; University of East Anglia, School of Nursing Sciences<br>Macgregor, Alexander; University College London, Institute of Orthopaedics and Musculoskeletal Science<br>Goldberg, Andrew; University College London, Institute of Orthopaedics and Musculoskeletal Science |
| <b>Primary Subject Heading</b>: | Qualitative research                                                                                                                                                                                                                                                                                                                                              |
| Secondary Subject Heading:      | Surgery                                                                                                                                                                                                                                                                                                                                                           |
| Keywords:                       | Foot & ankle < ORTHOPAEDIC & TRAUMA SURGERY, QUALITATIVE RESEARCH, Musculoskeletal disorders < ORTHOPAEDIC & TRAUMA SURGERY                                                                                                                                                                                                                                       |
|                                 |                                                                                                                                                                                                                                                                                                                                                                   |

SCHOLARONE™  
Manuscripts

# How do patients make decisions about which surgical treatment to undergo? A Qualitative Study

Razi Zaidi<sup>1</sup> BSc MBBS MRCS

Michael Pfeil<sup>2</sup> PhD RN

Alex J Macgregor<sup>1</sup> MA, MD, PhD, FRCP

Andy Goldberg OBE<sup>1</sup> MD FRCS(Tr&Orth)

Correspondence to Razi Zaidi, razizaidi@doctors.net.uk

---

<sup>1</sup> UCL Institute of Orthopaedics and Musculoskeletal Science (IOMS)  
Royal National Orthopaedic Hospital (RNOH),  
Brockley Hill,  
Stanmore HA7 4LP

<sup>2</sup> University of East Anglia  
Edith Cavell Building 2.15  
Norwich Research Park  
Norwich  
NR4 7TJ  
UK

## Copyright for authors

The Corresponding Author has the right to grant on behalf of all authors and does grant on behalf of all authors, a worldwide licence to the Publishers and its licensees in perpetuity, in all forms, formats and media (whether known now or created in the future), to i) publish, reproduce, distribute, display and store the Contribution, ii) translate the Contribution into other languages, create adaptations, reprints, include within collections and create summaries, extracts and/or, abstracts of the Contribution, iii) create any other derivative work(s) based on the Contribution, iv) to exploit all subsidiary rights in the Contribution, v) the inclusion of electronic links from the Contribution to third party material where-ever it may be located; and, vi) licence any third party to do any or all of the above.

## Conflict of Interest

We have read and understood the BMJ Group policy on declaration of interests and have no relevant interests to declare.

## Authorship

All of the four authors listed were involved in conception, design, analysis and interpretation of generated data. Additionally all were involved in drafting, revising and final approval of the version to be published.

## Abstract

**Objective** To examine how patients decide between different surgical options for their condition.

**Design** Purposive patient selection, qualitative design based on in-depth interviews.

**Setting** Royal National Orthopaedic Hospital, Stanmore, UK.

**Participants** 14 patients diagnosed with end-stage ankle osteoarthritis.

**Results** We interviewed 6 male and 8 female with a mean age of 58 years (range 41 to 83). All had opted for surgery after failure of at least 6 months of conservative management, sequentially trading-off daily activities to limit evolving pain. To decide between two offered treatments of ankle fusion and total ankle replacement (TAR) three major sources informed the patients decision making process; their surgeon; peers; and the media. The treating surgeon was viewed as the most reliable and influential source of information. Information gleaned from other patients was also important but carries risks as does information gleaned from the Internet and grey media, both of which invariably required validation by the surgeon and in some cases the GP. The quality of the doctor-patient relationship dictated the validity patients ascribed to their clinical interaction.

**Conclusions** Patients seek knowledge from a wealth of sources including the Internet, web forums, and other patients. Whilst they leverage family and friends to guide decision making, the most important and influential factor in governing how patients decide on any particular surgical intervention is their surgeon. A high quality doctor-patient relationship, coupled with clear, balanced and complete information is essential to enable shared decision-making to become a standard model of care.

## Introduction

The UK National Health Service (NHS) has adopted a philosophy of “*no decision about me, without me*”, moving away from a paternalistic model of decision-making towards a shared decision-making process between patient and clinician.<sup>1</sup> This ideal is the foundation of high-quality healthcare and is especially important in the context of long-term conditions and chronic illness,<sup>2</sup> such as osteoarthritis.

End stage osteoarthritis of the ankle is a major cause of disability with an impact on quality of life similar to end-stage heart failure<sup>3</sup> and hip arthritis.<sup>4</sup> Its demand incidence has been recently estimated to be 47.7 per 100,000 in the UK.<sup>5</sup> The majority of cases of ankle osteoarthritis are secondary to trauma or other diseases such as inflammatory arthritis.<sup>5</sup>

Its treatment includes a wealth of non-operative measures, such as activity modification, analgesia, bracing and physiotherapy. After these measures have failed, there are two established surgical treatments, ankle fusion, and ankle replacement, both of which have been shown to be valid and cost effective treatments<sup>6</sup> with a degree of clinical equipoise between them.<sup>7</sup> End-stage ankle osteoarthritis therefore serves as a good model to assess how patients decide on surgery and between surgical treatments. The aim of this paper is to carry out a qualitative study that explores how patients make decisions regarding their surgical treatment options.

## Methods and Materials

This study took a qualitative, interview-based approach to explore and analyse how patients' with end-stage ankle osteoarthritis decide between two different surgical treatments, ankle fusion and total ankle replacement (TAR).

## Sample

The study was based at the Royal National Orthopaedic Hospital NHS Trust, Stanmore, UK, a specialist hospital which offers both TAR and ankle fusion as standard treatment options. Patients

1  
2  
3 diagnosed with end-stage ankle osteoarthritis were purposively recruited prior to their outpatient visit  
4  
5 to discuss their surgical treatment. Recruitment continued until data saturation became noticeable  
6  
7 during the last three interviews. The interviews took place prior to the appointment with their surgeon  
8  
9 to discuss their decision on treatment, but after at least 6 months of unsuccessful non-operative  
10  
11 measures had been tried and all treatment options had been discussed with them.  
12

### 13 14 15 16 *Data collection and analysis* 17

18  
19 Having given informed consent all participants underwent semi-structured interviews, face-to-face  
20  
21 (n=14). An interview guide was used for each interview. It focused on their experience of the  
22  
23 condition, the information sources they had used, the treatment options and preferences. The  
24  
25 interviews lasted between 30 and 60 minutes; they were audio-recorded and transcribed verbatim.  
26  
27 The data was analysed inductively by RZ and MP, using manual thematic analysis<sup>8</sup> to identify,  
28  
29 validate and report any themes arising from the data. These were organised, described in rich detail,  
30  
31 interpreted and interlinked within a comprehensive categorisation system. Finally, in order to validate  
32  
33 our results a process of peer-debriefing<sup>9</sup> was also employed. This meant that the remaining authors  
34  
35 questioned the analytical results requiring their justification based on the original data.  
36  
37  
38  
39

### 40 41 *Ethical issues* 42

43  
44 This work was approved locally through the R&D Institutional Review Board at the Royal National  
45  
46 Orthopaedic Hospital NHS Trust, who confirmed that as these interviews were carried out as part of a  
47  
48 wider service evaluation no formal ethical approval was required. Nevertheless, ethical procedures  
49  
50 were strictly adhered to including the provision of full participant information enabling informed  
51  
52 consent and assuring that strict participant anonymity was maintained, for example by allocating  
53  
54 numeric codes to all participant contributions.  
55  
56  
57  
58  
59  
60

## Results

A total of 14 patients (6 male and 8 female), with a mean age of 58 years (range 41 to 83), each with a diagnosis of ankle osteoarthritis were purposively recruited. All participants had suffered with ankle arthritis for between 10-40 years and all had tried at least 6 months of non-operative measures prior to being referred. All patients had developed a good understanding of their condition and current state over many years using a wide variety of information sources. We have divided our findings into three broad themes:

### *Theme 1: Why patients opt for surgery*

All patients in our sample had unsuccessfully tried non-operative treatment. Hence persistent pain and failure of non-operative measures seemed to be the dominant reason for surgery, frequently described as “*horrendous*” (Patient 2) or “*unbearable*” (Patient 1). All patients described a sequential process of activity reduction as a result of worsening pain.

*“You live with the pain and restrict your lifestyle to cope with it, until you can’t cope. So I now need an operation.” (Patient 1)*

This trade-off process eventually concluded with one of two events that preceded the decision to undergo surgery. The first arose when the participants had become so restricted by the pain that they were unable to function or work and had no further activities to trade-off, and the second when they were forced to give up a specific activity that was very important to them. One participant was particularly keen to return to dancing and asserted that this was her main impetus for surgical intervention. Overall recreational activities were an important theme and participants anticipated some return to them post-surgery.

1  
2  
3                   *“Squash, golf, I can’t do any of them now; the only activity I can do is swimming. I have put a*  
4  
5                   *lot of weight on as a result of not being able to do what I used to; I just hope to get back to*  
6  
7                   *doing something.”(Patient 9)*  
8  
9

10  
11 The ability to work was a key factor and appeared to both induce and resist the need for surgical  
12 intervention. Loss of earnings during the post-operative rest period was raised as a major reason for  
13 putting off surgery in those previously offered intervention (n=5). This represents a ‘worker’s  
14 paradox’. Surgery is required to continue in employment, but the temporary loss of earnings during  
15 the recovery period is seen as being prohibitive.  
16  
17

18 In some cases, the worry of spreading pain was an impetus to proceed with surgery.  
19  
20

21  
22                   *“It’s affecting my other joints, my knee and my back, so I just want to get the ankle sorted to*  
23                   *take the pressure off the rest.”(Patient 11)*  
24  
25

26  
27 Indeed, several patients felt that other joints were painful as a result of their ankle (n=6) and this  
28 contributed to their decision to proceed with surgery in a hope they could prevent or ease these  
29 symptoms.  
30  
31  
32  
33  
34  
35

## 36 37 38 39 ***Theme 2: Information sources for decision making***

40  
41 Three major source of information emerged from our study; healthcare professionals; peer influence;  
42 and the media.  
43  
44

45  
46 The patients in our sample reported good relationships with their current surgeons and rated the  
47 information provided by them as the highest influence in deciding between operations because of its  
48 perceived reliability (n=14).  
49  
50

51  
52                   *“Speaking to the consultant and team has had the most impact on my decision*  
53                   *making.”(Patient 7)*  
54  
55

56  
57 The role of the general practitioner differed depending on the relationship between patient and GP.  
58  
59  
60



1  
2  
3 *“I go to my GP with the letter from the surgeon and find it helpful to talk through the letter*  
4 *with someone I am close to” (Patient 13)*  
5  
6

7 Where the relationship between patient and GP was strong, GP’s were frequently used as sounding  
8 boards, but where the relationship was poor, demonstrated the role of the GP as merely a gate keeper.  
9

10  
11 *“I don’t ever see the same GP twice. I don’t see any role for my GP other than to refer me”*  
12 *(Patient 14)*  
13  
14

15 Indeed, rapport between patient and surgeon was also key. This distinction became clear in cases  
16 where patients had been referred on for second opinions.  
17  
18

19  
20 *“I didn’t have confidence in the first surgeon, so I sought a second opinion” (Patient 1)*  
21  
22

23 Similarly the lack of treatment options by a centre would influence some patients.  
24

25  
26 *“The surgeon I initially saw only offered fusion and I didn’t feel I had all the information I*  
27 *needed, so I sought a second opinion.”(Patient 4)*  
28  
29

30 Peer influence was the second most significant factor that shaped decision-making.  
31

32  
33 *“I had [famous sportsman] in my cab and he told me he had an ankle fusion, with a great*  
34 *result, so I decided if it’s good enough for him, then its good enough for me” (Patient 7)*  
35  
36

37 Equally, reports of substandard outcomes could result in the formation of negative perceptions.  
38

39  
40 *“I asked a friend of mine who had the operation; she said it extremely painful so that made*  
41 *me reconsider.”(Patient 3)*  
42  
43

44 Peer influence also has the potential to mislead when patients mistakenly compare themselves to  
45 others who have undergone a different operation. In our sample one patient undergoing ankle fusion  
46 took peer-advice from a friend who had undergone a different procedure to fuse a different joint in the  
47 foot. This formed the incorrect perception in his mind that he would have a good range of motion in  
48 his ankle following fusion, which sets out to stiffen the joint by definition.  
49  
50

51 The third major source of information in terms of influence was the Internet. All patients (n=14) used  
52 the Internet to search for information on the procedures, and on other patient experiences.  
53  
54

1  
2  
3 *"You have to make sure the information you find is reliable but I was largely reading stuff*  
4 *from medical journals and websites from institutions that specialise in ankle*  
5 *replacement."* (Patient 6)  
6  
7

8  
9 The effectiveness of the internet to find information could at times be overwhelming and some  
10 participants found it hard to limit their searches.  
11

12  
13  
14 *"The internet is big and too scary because you don't know enough, anyone can say anything"*  
15 *(Patient 5)*  
16  
17

18 Internet forums were often accessed and appear to represent a widening of the peer-influence on the  
19 patient. Using this part of the Internet allowed the participants direct contact with other patients, who  
20 had undergone the same operation.  
21  
22

23  
24  
25 *"I went onto a forum to try and gather other people's experiences, I found it very*  
26 *useful."* (Patient 1)  
27  
28

29 A common theme was a difficulty in knowing how to ensure credibility of the information source  
30 (n=10). The strength attributed to the surgeon's advice was demonstrated when it overruled other,  
31 conflicting information sources.  
32  
33

34  
35  
36 *"I always check any new information with my surgeon. I trust what he tells me over anyone*  
37 *else, he sees this all the time and knows best."* (Patient 12)  
38  
39

40 Overall, the internet was rated by patients as having the least influence on deciding what operation to  
41 have (n=14), while the treating surgeon was the most influential (n=14). The influence of friends and  
42 family, appears to feature more in the final theme.  
43  
44  
45  
46  
47  
48  
49

### 50 ***Theme 3: How patients decide the best option for them***

51

52 Patients make decisions based on their own summary of all the information available to them coupled  
53 with the sounding and guidance from their immediate friends and family, and the practicalities of their  
54 home and work situation.  
55  
56  
57  
58  
59  
60

1  
2  
3 One key confounding factor seems to relate to a patient's adversity to risk. Patients with an inherent  
4 risk aversion, find it difficult to accept anything new and select their treatment based on the lowest  
5 risk and the most predictable outcome.  
6  
7

8  
9  
10 *"If had replacement I would be looking at another operation ten years down the line, with a*  
11 *fusion I can have one operation and still have a good quality of life and get back to*  
12 *work."* (Patient 8)  
13  
14

15  
16 Indeed the cumulative annual failure rate for ankle replacements is 1.9% per year<sup>10</sup> and in patients  
17 who want certainty this was seen as a significant barrier. In contrast patients willing to accept risk,  
18 found that certainty was in some cases unpalatable. For example, ankle fusion was viewed as a "final"  
19 (patient 2 and 4) option, after which there were no other alternatives.  
20  
21

22  
23 Patients seemed to realise that short term both surgical options would provide them with good pain  
24 relief, which in most cases is a correct assumption.<sup>11</sup> Often patients did not mind the risk of further  
25 surgery providing their choice offered them greater immediate benefits.  
26  
27

28  
29  
30  
31 *"I think a replacement would be best for me as I want to be active, even though I understand*  
32 *that I might need further surgery at a later date."* (Patient 10)  
33  
34  
35  
36  
37

## 38 Discussion

39  
40  
41 More than 5 million elective admissions for surgery take place in the UK each year<sup>12</sup>. In most cases  
42 more than one surgical treatment is available and it is therefore, crucial to better understand how  
43 patients decide between different surgical treatments.  
44  
45

46  
47  
48 Whilst there have been previous studies exploring the factors that influence patient decision making in  
49 medical situations<sup>13</sup> and when to opt for surgery<sup>14,15</sup>, we believe that our study is the first to assess not  
50 just why patients elect to undergo an intervention, but at how they decide between two interventions  
51 that have a degree of clinical equipoise.  
52  
53  
54  
55  
56  
57  
58  
59  
60

1  
2  
3 Three main sources of information emerged of which the surgeon was the most influential factor,  
4 followed by peer influence, and finally the media. The command of the surgeon has been described  
5 previously,<sup>16,17</sup> and even information gathered from other sources, invariably is proffered to the  
6 surgeon as final key validator.  
7  
8  
9

10  
11 In the wake of “The Bristol Case” British medicine has changed for the better<sup>18</sup> and increased scrutiny  
12 exists both from within the profession and from outside. As clinicians we have a duty to protect and  
13 promote the health of our patients<sup>19</sup>. The profession has acted by introducing revalidation<sup>20</sup> and in  
14 orthopaedics, the UK has been proactive in creating the world’s largest National Joint Registry, that  
15 records every hip, knee, ankle and shoulder replacement implanted in England and Wales, containing  
16 in excess of 1.5m records.<sup>21</sup> In the future, surgeon-level reported outcome data is a possibility.<sup>22</sup>  
17  
18  
19

20  
21 Aside from publicly available information, public scrutiny often manifests in patients seeking second  
22 opinions<sup>15</sup> as took place with several patients interviewed in this study.  
23  
24  
25  
26  
27

28  
29 The Internet is fast becoming a key driver of healthcare<sup>23</sup> and although is well described in young  
30 populations,<sup>16</sup> clearly also affects the more mature patients including 83 years olds in this study.  
31  
32 Importantly, however, this study also identifies that patients are aware of the limitations and risks  
33 associated with information from the Internet<sup>16,17,24</sup> and invariably turned to their surgeon for  
34 validation. Peer influence from other patients remains important, but the divide between peer  
35 influence and the Internet is blurring with the use of web forums<sup>25</sup> where accounts of patients who  
36 have undergone surgery seem highly persuasive and empowering,<sup>26</sup> but has the potential to deliver an  
37 unbalanced and sometimes inaccurate and hence dangerous view.  
38  
39  
40  
41  
42  
43  
44  
45  
46  
47

48  
49 Qualitative research employs smaller samples than randomised-controlled trials. In this study the  
50 sample size (n=14) was determined firstly, by purposively selecting participants who each could  
51 provide exhaustive data, and secondly by continuing to interview until data saturation<sup>1</sup> was achieved.<sup>8</sup>  
52  
53

54 This became noticeable when during the last three interviews no new themes emerged, and so data  
55  
56  
57  
58  
59  
60

1  
2  
3 collection ceased. It is therefore unlikely that a larger sample would have provided a bigger picture or  
4  
5 different result.  
6  
7

8  
9  
10 This study was carried out in a specialist centre offering both treatments and where clinical equipoise  
11 exists so that patients had been appropriately counselled by surgeons who have a clear understanding  
12 of both treatment options. Whilst it could be argued that a sample from a specialist centre is not  
13 representative of patients seen in the community or at a district general hospital, it also means that all  
14 patients interviewed had been given a complete set of validated information to guide their decision.  
15  
16 Indeed, given that a third of surgeons in the UK do not carry out ankle replacement<sup>27</sup> it is likely that  
17 patients from other centres, might not be offered complete and impartial information, which  
18 undoubtedly would influence the patient's decisions.  
19  
20

21  
22 This study used end stage ankle arthritis as its model, however, we believe that our results are  
23 applicable to a much wider range of chronic conditions requiring surgery and that patients' decision-  
24 making and its associated needs remain the same whatever the condition and wherever the patient is  
25 treated.  
26  
27

## 28 29 30 31 32 33 34 35 36 37 38 **Conclusion**

39  
40 Patients seek knowledge from a wealth of sources including the Internet, web forums, and other  
41 patients. Whilst they leverage family and friends to guide decision making, the most important and  
42 influential factor in governing how patients decide on any particular surgical intervention is their  
43 surgeon, hence a surgeon's personal preferences and inclinations can dominate the patient's decision.  
44  
45 Therefore clear and balanced, evidence-based information is crucial to allow patients to make  
46 informed choice. Good communication by the surgeon assists in the development of a high quality  
47 doctor-patient relationship and will enable shared decision-making to become a reality.  
48  
49  
50  
51  
52  
53  
54  
55  
56  
57  
58  
59  
60

## References

1. **No Authors Listed.** Liberating the NHS: No decision about me, without me. Department of Health, 2012.
2. **Joosten EA, DeFuentes-Merillas L, de Weert GH, Sensky T, van der Staak CP, de Jong CA.** Systematic review of the effects of shared decision-making on patient satisfaction, treatment adherence and health status. *Psychother Psychosom* 2008;77-4:219-226.
3. **Saltzman CL, Zimmerman MB, O'Rourke M, Brown TD, Buckwalter JA, Johnston R.** Impact of comorbidities on the measurement of health in patients with ankle osteoarthritis. *J Bone Joint Surg Am.* 2006;88-11:2366-2372.
4. **Glazebrook M, Daniels T, Younger A, Foote CJ, Penner M, Wing K, Lau J, Leighton R, Dunbar M.** Comparison of health-related quality of life between patients with end-stage ankle and hip arthrosis. *J Bone Joint Surg Am* 2008;90-3:499-505.
5. **Goldberg AJ, Macgregor A, Dawson J, Singh D, Cullen N, Sharp RJ, Cooke PH.** The demand incidence of symptomatic ankle osteoarthritis presenting to foot & ankle surgeons in the United Kingdom. *Foot* 2012;22-3:163-166.
6. **Courville XF, Hecht PJ, Tosteson AN.** Is total ankle arthroplasty a cost-effective alternative to ankle fusion? *Clin Orthop Relat Res* 2011;469-6:1721-1727.
7. **Haddad SL, Coetzee JC, Estok R, Fahrbach K, Banel D, Nalysnyk L.** Intermediate and long-term outcomes of total ankle arthroplasty and ankle arthrodesis. A systematic review of the literature. *J Bone Joint Surg Am* 2007;89-9:1899-1905.
8. **Guest G, MacQueen KM, Namey EE.** *Applied Thematic Analysis.* Los Angeles: Sage, 2012.
9. **Lincoln Y, Guba E.** *Naturalistic Inquiry.* Newbury Park, CA: Sage Publications, 1985.
10. **Zaidi R, Cro S, Gurusamy K, Siva N, Macgregor A, Henricson A, Goldberg A.** Outcomes of Primary Modern Total Ankle Replacements – A Systematic Review and Meta-Analysis, UCL *Institute of Orthopaedics and Musculoskeletal Science*, 2013.

- 1  
2  
3 **11. Slobogean GP, Younger A, Apostle KL, Marra CA, Wing K, Penner M, Daniels T,**  
4 **Glazebrook M.** Preference-based quality of life of end-stage ankle arthritis treated with arthroplasty  
5 or arthrodesis. *Foot Ankle Int* 2010;31-7:563-566.  
6  
7  
8  
9 **12. No Authors Listed.** <http://www.hesonline.nhs.uk> (Feb 2013).  
10  
11 **13. Morton RL, Tong A, Howard K, Snelling P, Webster AC.** The views of patients and carers in  
12 treatment decision making for chronic kidney disease: systematic review and thematic synthesis of  
13 qualitative studies. *BMJ* 2010;340:c112.  
14  
15  
16  
17 **14. O'Neill T, Jinks C, Ong BN.** Decision-making regarding total knee replacement surgery: a  
18 qualitative meta-synthesis. *BMC Health Serv Res* 2007;7:52.  
19  
20  
21 **15. Clark JP, Hudak PL, Hawker GA, Coyte PC, Mahomed NN, Kreder HJ, Wright JG.** The  
22 moving target: a qualitative study of elderly patients' decision-making regarding total joint  
23 replacement surgery. *J Bone Joint Surg Am* 2004;86-A-7:1366-1374.  
24  
25  
26  
27 **16. Davies E, Yeoh KW.** Internet chemotherapy information: impact on patients and health  
28 professionals. *Br J Cancer* 2012;106-4:651-657.  
29  
30  
31 **17. Xie B.** Older adults' health information wants in the internet age: implications for patient-provider  
32 relationships. *J Health Commun* 2009;14-6:510-524.  
33  
34  
35  
36 **18. Smith R.** All changed, changed utterly. British medicine will be transformed by the Bristol case.  
37 *BMJ* 1998;316-7149:1917-1918.  
38  
39  
40 **19. No Authors Listed.** [http://www.gmc-](http://www.gmc-uk.org/guidance/good_medical_practice/duties_of_a_doctor.asp)  
41 [uk.org/guidance/good\\_medical\\_practice/duties\\_of\\_a\\_doctor.asp](http://www.gmc-uk.org/guidance/good_medical_practice/duties_of_a_doctor.asp) (Feb 2013).  
42  
43  
44 **20. No Authors Listed.** Revalidation: what you need to do. General Medical Council, 2012.  
45  
46 **21. No Authors Listed.** Public and Patient Guide to the NJR Annual Report 2012.  
47 <http://www.njrcentre.org.uk>, 2012.  
48  
49  
50 **22. Hill M.** NHS medical director wants surgeon league tables [http://www.bbc.co.uk/news/health-](http://www.bbc.co.uk/news/health-20584897)  
51 [20584897](http://www.bbc.co.uk/news/health-20584897) Dec 2012.  
52  
53  
54 **23. Impicciatore P, Pandolfini C, Casella N, Bonati M.** Reliability of health information for the  
55 public on the World Wide Web: systematic survey of advice on managing fever in children at home.  
56 *BMJ* 1997;314-7098:1875-1879.  
57  
58  
59  
60

1  
2  
3 **24. Smith JT, Pate OL, Guss D, Lee JT, Chiodo CP, Bluman EM.** Internet information quality for  
4 ten common foot and ankle diagnoses. *Foot Ankle Surg* 2012;18-3:198-202.

5  
6  
7 **25. Preece J.** Emphatic communities: balancing emotional and factual communication. *Interacting*  
8 *with Computers* 1999;12-1:63-77.

9  
10  
11 **26. van Uden-Kraan CF, Drossaert CH, Taal E, Seydel ER, van de Laar MA.** Participation in  
12 online patient support groups endorses patients' empowerment. *Patient Educ Couns* 2009;74-1:61-69.

13  
14  
15 **27. Goldberg AJ, Sharp RJ, Cooke P.** Ankle replacement: current practice of foot & ankle surgeons  
16 in the United kingdom. *Foot Ankle Int* 2009;30-10:950-954.  
17  
18  
19  
20  
21  
22  
23  
24  
25  
26  
27  
28  
29  
30  
31  
32  
33  
34  
35  
36  
37  
38  
39  
40  
41  
42  
43  
44  
45  
46  
47  
48  
49  
50  
51  
52  
53  
54  
55  
56  
57  
58  
59  
60





**How do patients with end-stage ankle arthritis make decisions between two different surgical treatments? A Qualitative Study**

|                                 |                                                                                                                                                                                                                                                                                                                                                                   |
|---------------------------------|-------------------------------------------------------------------------------------------------------------------------------------------------------------------------------------------------------------------------------------------------------------------------------------------------------------------------------------------------------------------|
| Journal:                        | <i>BMJ Open</i>                                                                                                                                                                                                                                                                                                                                                   |
| Manuscript ID:                  | bmjopen-2013-002782.R1                                                                                                                                                                                                                                                                                                                                            |
| Article Type:                   | Research                                                                                                                                                                                                                                                                                                                                                          |
| Date Submitted by the Author:   | 07-May-2013                                                                                                                                                                                                                                                                                                                                                       |
| Complete List of Authors:       | Zaidi, Razi; UCL , Institute of Orthopaedics and Musculoskeletal Science<br>Pfeil, Michael; University of East Anglia, School of Nursing Sciences<br>Macgregor, Alexander; University College London, Institute of Orthopaedics and Musculoskeletal Science<br>Goldberg, Andrew; University College London, Institute of Orthopaedics and Musculoskeletal Science |
| <b>Primary Subject Heading</b>: | Qualitative research                                                                                                                                                                                                                                                                                                                                              |
| Secondary Subject Heading:      | Surgery                                                                                                                                                                                                                                                                                                                                                           |
| Keywords:                       | Foot & ankle < ORTHOPAEDIC & TRAUMA SURGERY, QUALITATIVE RESEARCH, Musculoskeletal disorders < ORTHOPAEDIC & TRAUMA SURGERY                                                                                                                                                                                                                                       |
|                                 |                                                                                                                                                                                                                                                                                                                                                                   |

SCHOLARONE™  
Manuscripts

Only

# How do patients with end-stage ankle arthritis make decisions between two different surgical treatments? A Qualitative Study

Mr Razi Zaidi<sup>1</sup> BSc MBBS MRCS

Dr Michael Pfeil<sup>2</sup> PhD RN

Prof Alexander J Macgregor<sup>1</sup> MA, MD, PhD, FRCP

Mr Andy Goldberg<sup>1</sup> OBE MD FRCS(Tr&Orth)

Correspondence to Razi Zaidi, razizaidi@doctors.net.uk

---

<sup>1</sup> UCL Institute of Orthopaedics and Musculoskeletal Science (IOMS)  
Royal National Orthopaedic Hospital (RNOH),  
Brockley Hill,  
Stanmore HA7 4LP

<sup>2</sup> University of East Anglia  
Faculty of Medicine and Health Sciences  
Edith Cavell Building 2.15  
Norwich Research Park  
Norwich  
NR4 7TJ  
UK

## Copyright for authors

The Corresponding Author has the right to grant on behalf of all authors and does grant on behalf of all authors, a worldwide licence to the Publishers and its licensees in perpetuity, in all forms, formats and media (whether known now or created in the future), to i) publish, reproduce, distribute, display and store the Contribution, ii) translate the Contribution into other languages, create adaptations, reprints, include within collections and create summaries, extracts and/or, abstracts of the Contribution, iii) create any other derivative work(s) based on the Contribution, iv) to exploit all subsidiary rights in the Contribution, v) the inclusion of electronic links from the Contribution to third party material where-ever it may be located; and, vi) licence any third party to do any or all of the above.

## Conflict of Interest

We have read and understood the BMJ Group policy on declaration of interests and have no relevant interests to declare.

## Authorship

All of the four authors listed were involved in conception, design, analysis and interpretation of generated data. Additionally all were involved in drafting, revising and final approval of the version to be published.

## Abstract

**Objective** To examine how patients decide between ankle fusion and ankle replacement in end-stage ankle arthritis.

**Design** Purposive patient selection, semi-structured interviews, thematic analysis.

**Setting** Royal National Orthopaedic Hospital, Stanmore, UK.

**Participants** 14 patients diagnosed with end-stage ankle osteoarthritis.

**Results** We interviewed 6 male and 8 female with a mean age of 58 years (range 41 to 83). All had opted for surgery after failure of at least 6 months of conservative management, sequentially trading-off daily activities to limit evolving pain. To decide between two offered treatments of ankle fusion and total ankle replacement (TAR) three major sources informed the patients decision making process; their surgeon; peers; and the media. The treating surgeon was viewed as the most reliable and influential source of information. Information gleaned from other patients was also important but carries risks as does information gleaned from the Internet and grey media, both of which invariably required validation by the surgeon and in some cases the GP.

**Conclusions** Patients seek knowledge from a wealth of sources including the Internet, web forums, and other patients. Whilst they leverage each of these sources to guide decision making, the most important and influential factor in governing how patients decide on any particular surgical intervention is their surgeon. A high quality doctor-patient relationship, coupled with clear, balanced and complete information is essential to enable shared decision-making to become a standard model of care.

## Article Summary

### Article Focus

- Qualitative assessment of how patients with end stage osteoarthritis of the ankle decide between surgical interventions offered to them.
- Discuss the sources of information patient's use to aid their decision-making.

### Key Message

- The surgeon, the Internet and peers influence patients in their decision making but the surgeon appeared to be the most valued source of information.

### Strengths and limitations of this study

- The strengths include this being the first study to take a qualitative look at how patients decide between ankle fusion and ankle replacement to treat end stage ankle osteoarthritis.
- The limitations include sampling from a single specialist centre and the relatively small sample size although data saturation was reached.

## Introduction

The UK National Health Service (NHS) has adopted a philosophy of “*no decision about me, without me*”, moving away from a paternalistic model of decision-making towards a shared decision-making process between patient and clinician.<sup>1</sup> This ideal is the foundation of high-quality healthcare and is especially important in the context of long-term conditions and chronic illness, such as osteoarthritis.

Patient and doctor interactions are underpinned by three main decision making models,<sup>2</sup> these being paternalistic, informed and shared.

1  
2  
3 The paternalistic model assumes the doctor knows best. It is characterised by the passive compliance  
4 of the patient to the authority of the surgeon, who is the custodian of the patient's best interest. As a  
5 result decisions may even be counter to the patient's wishes, as long as the patient is perceived to  
6 benefit.<sup>3</sup> This approach is less desirable in the setting of elective surgery but still has its applications  
7 in trauma and life threatening situations, where patients may present acutely with altered  
8 consciousness or mental state.

14  
15  
16  
17 At the other end of the spectrum is the informed model, where all decisions are made by the patient.  
18 The role of the doctor is to deliver to the patient information on all relevant treatment options  
19 including their benefits and risks. Communication in this model is one way.<sup>2</sup>

20  
21  
22  
23  
24  
25 Shared decision making (SDM) is a two way interaction where the doctor and patient share all stages  
26 of the decision making process simultaneously and reach a decision together.<sup>4</sup> This is the ideal held  
27 by the NHS and affords many advantages in the orthopaedics setting. SDM increases patient  
28 knowledge and understanding, and creates more accurate expectations. It allows for better tailoring of  
29 treatment to patient values and has been shown to result in higher satisfaction.<sup>5</sup>

30  
31  
32  
33  
34  
35  
36  
37 Decision making has been examined in orthopaedic surgery mainly in the context of hip and knee  
38 joint replacement. The majority of the work has centred on the decision of whether to undergo surgery  
39 or not.<sup>6,7</sup> We chose to look at a different question, namely as to how patients that have decided to  
40 undergo surgery, decide between different treatment options. The model we have used pertains to  
41 patients with end-stage ankle osteoarthritis.

42  
43  
44  
45  
46  
47  
48  
49  
50 We believe that ankle osteoarthritis is a good model to study because there are two accepted surgical  
51 treatments, ankle fusion, and total ankle replacement (TAR), both of which have been shown to be  
52 valid and cost effective treatments<sup>8</sup> with a degree of clinical equipoise between them.<sup>9</sup> Osteoarthritis  
53 of the ankle is a major cause of disability with an impact on quality of life similar to end-stage heart  
54  
55  
56  
57  
58  
59  
60

1  
2  
3 failure<sup>10</sup> and hip arthritis.<sup>11</sup> Its demand incidence has been recently estimated to be 47.7 per 100,000  
4  
5 in the UK.<sup>12</sup> The majority of cases of ankle osteoarthritis are secondary to trauma or other diseases  
6  
7 such as inflammatory arthritis.<sup>12</sup> The aim of this paper is to carry out a qualitative study that explores  
8  
9 how patients who have decided that they want to undergo surgery, make decisions between these two  
10  
11 treatments.

## 12 13 14 15 16 17 **Methods and Materials**

18  
19 This study took a qualitative, interview-based approach to explore and analyse how patients' with  
20  
21 severe ankle osteoarthritis decide between two different surgical treatments, ankle fusion and TAR.  
22  
23

### 24 25 26 27 *Sample*

28  
29 The study was based at the Royal National Orthopaedic Hospital NHS Trust, Stanmore, UK, a  
30  
31 specialist hospital, which offers both ankle fusion and TAR as standard treatment options. Patients  
32  
33 diagnosed with end-stage ankle osteoarthritis were purposively recruited prior to their outpatient visit  
34  
35 to discuss their surgical treatment. Our inclusion criteria were patients of all ages with ankle  
36  
37 osteoarthritis (diagnosed by clinical history and plain radiography) who had tried at least 6 months of  
38  
39 non-operative treatment, and whom were suitable for either a TAR or fusion and had opted for  
40  
41 operative intervention but were undecided between the two treatment options. The patients were given  
42  
43 verbal and written information pertaining survivorship, function, complications and post-operative  
44  
45 rehabilitation relating to both treatments. Skeletal models and pictures were used during the  
46  
47 consultation to support verbal information conveyed, and all patients were provided with a written  
48  
49 patient information sheet, as aides to decision making. Interviews took place prior to the second  
50  
51 appointment, which served as a platform for them to declare their treatment choice. We excluded  
52  
53 patients who were only suitable for one of the interventions, or had declined surgery. Patients were  
54  
55 approached directly (by RZ and AG) in clinic and the purpose of the study was explained to each  
56  
57  
58  
59  
60

1  
2  
3 patient. Following a 'cooling-down' period of 72 hours patients were asked if they remained happy to  
4 participate in the study. Recruitment continued until data saturation became noticeable during the last  
5 three interviews.  
6  
7  
8  
9

### 10 11 12 *Data collection and analysis* 13

14  
15 Following informed consent all participants underwent face-to-face, semi-structured interviews  
16 (n=14). The interviews were conducted by one of the authors (RZ) in the outpatient department. An  
17 interview guide was used. It consisted of open-ended questions and was based on the research  
18 objective and existing literature (Table 1). The schedule focused on the patients' experience of the  
19 condition, the information sources they had used, the treatment options open to them and their  
20 preferences. The interviews lasted between 45 and 60 minutes; they were audio-recorded and  
21 transcribed verbatim.  
22  
23  
24  
25  
26  
27  
28  
29  
30  
31

32 The data was analysed inductively by RZ and MP, using thematic analysis<sup>13</sup>. This is a highly flexible  
33 analytical method capable of producing the detailed and systematic account of the issues and opinions  
34 contained within in the data that was required for this study.<sup>14</sup> The first analytical step involved  
35 repeatedly reading the interview transcripts and becoming familiar with the content. This allowed  
36 initial patterns and codes to emerge from the text. During the subsequent line-by-line analysis, these  
37 codes were refined and grouped into themes. Each theme was described in rich detail and interpreted.  
38 Themes were eventually interlinked within a comprehensive categorisation system. Finally, in order  
39 to validate our results a process of peer-debriefing<sup>15</sup> was also employed. This meant that the  
40 remaining authors (AG, AM) questioned the analytical results requiring their justification based on  
41 the original data.  
42  
43  
44  
45  
46  
47  
48  
49  
50  
51

### 52 53 54 55 56 *Ethical issues* 57 58 59 60



1  
2  
3 This work was approved locally through the R&D Institutional Review Board at the Royal National  
4 Orthopaedic Hospital NHS Trust, who confirmed that as these interviews were carried out as part of a  
5 wider service evaluation no formal ethical approval was required. Nevertheless, ethical procedures  
6 were strictly adhered to including the provision of full written participant information enabling  
7 informed consent and by assuring that strict participant anonymity was maintained, for example by  
8 allocating numeric codes to all participant contributions. All participants were aware that they could  
9 stop taking part at any time.  
10  
11  
12  
13  
14  
15  
16

## 20 Results

21  
22 A total of 14 patients (6 male and 8 female), each with a diagnosis of ankle osteoarthritis were  
23 purposively recruited. All participants had suffered with ankle arthritis for between 10-40 years and  
24 all had tried at least 6 months of non-operative measures prior to being referred. All patients had  
25 developed a good understanding of their condition and current state over many years using a wide  
26 variety of information sources.  
27  
28  
29  
30  
31  
32

33  
34 “I have osteoarthritis in the ankle possibly due to a fracture of the tibia and fibula I had many  
35 years ago. This had led to the wearing away of cartilage in the joint, which creates  
36 pain.”(Patient 6)  
37  
38  
39

40 Indeed the commonest cause of osteoarthritis of the ankle is following trauma such as severe sprains<sup>16</sup>  
41 or fractures of the ankle.<sup>17</sup> We have divided our findings into three broad themes:  
42  
43  
44  
45  
46  
47

### 48 *Theme 1: Why patients opt for surgery*

49  
50 All patients in our sample had unsuccessfully tried non-operative treatment. Hence persistent pain and  
51 failure of non-operative measures were the dominant reason for surgery, frequently described as  
52 “horrendous” (Patient 2) or “unbearable” (Patient 1). All patients described a sequential process of  
53 activity reduction as a result of worsening pain.  
54  
55  
56  
57  
58  
59  
60

1  
2  
3 *"You live with the pain and restrict your lifestyle to cope with it, until you can't cope. So I*  
4 *now need an operation."*(Patient 1)  
5  
6

7 This trade-off process eventually concluded with one of two events that preceded the decision to  
8 undergo surgery. The first arose when the participants had become so restricted by the pain that they  
9 were unable to function or work and had no further activities to trade-off, and the second when they  
10 were forced to give up a specific activity that was very important to them. One participant was  
11 particularly keen to return to dancing and asserted that this was her main impetus for surgical  
12 intervention. Overall recreational activities were an important theme and participants anticipated some  
13 return to them post-surgery.  
14  
15  
16  
17  
18  
19  
20  
21

22 *"Squash, golf, I can't do any of them now; the only activity I can do is swimming. I have put a*  
23 *lot of weight on as a result of not being able to do what I used to; I just hope to get back to*  
24 *doing something."*(Patient 9)  
25  
26  
27  
28

29 In some cases, the worry of spreading pain was an impetus to proceed with surgery.  
30

31 *"It's affecting my other joints, my knee and my back, so I just want to get the ankle sorted to*  
32 *take the pressure off the rest."*(Patient 11)  
33  
34  
35

36 Several patients felt that other joints were painful as a result of their ankle and this appeared to  
37 contribute to their decision to proceed with surgery in a hope they could prevent or ease these  
38 symptoms.  
39  
40  
41  
42  
43  
44

45 The ability to work was a key factor that not only induced a perceived need for surgical intervention,  
46 it could also result in patients initially declining surgery. In these cases loss of earnings during the  
47 post-operative rest period was raised as the reason for putting off surgery. This represents a 'worker's  
48 paradox' as surgery is required to continue in employment, but the temporary loss of earnings during  
49 the recovery period is seen as being prohibitive.  
50  
51  
52  
53  
54  
55  
56  
57  
58  
59  
60

## *Theme 2: Information sources for decision making*

Three major source of information emerged from our study; healthcare professionals; peer influence; and the media. The patients in our sample reported good relationships with their current surgeons and rated the information provided by them as the highest influence in deciding between operations because of its perceived reliability.

*“Speaking to the consultant and team has had the most impact on my decision making.” (Patient 7)*

The role of the general practitioner differed depending on the relationship between patient and GP.

*“I go to my GP with the letter from the surgeon and find it helpful to talk through the letter with someone I am close to.” (Patient 13)*

Where the relationship between patient and GP was strong, GPs were frequently used as sounding boards, but where the relationship was poor, the role of the GP as merely that of a gate keeper.

*“I don’t ever see the same GP twice. I don’t see any role for my GP other than to refer me.” (Patient 14)*

Indeed, rapport between patient and surgeon was also key. This distinction became clear in cases where patients had been referred on for second opinions.

*“I didn’t have confidence in the first surgeon, so I sought a second opinion” (Patient 1)*

Similarly the lack of treatment options by a centre would influence some patients.

*“The surgeon I initially saw only offered fusion and I didn’t feel I had all the information I needed, so I sought a second opinion.” (Patient 4)*

Peer influence was the second most significant factor that shaped decision-making.

*“ I had [famous sportsman] in my cab and he told me he had an ankle fusion, with a great result, so I decided if it’s good enough for him, then its good enough for me” (Patient 7)*

1  
2  
3 Equally, reports of substandard outcomes could result in the formation of negative perceptions.  
4

5 *“I asked a friend of mine who had the operation; she said it extremely painful so that made*  
6 *me reconsider.”(Patient 3)*  
7  
8  
9

10 Peer influence also has the potential to mislead when patients mistakenly compare themselves to  
11 others who have undergone a different operation. In our sample one patient undergoing ankle fusion  
12 took peer-advice from a friend who had undergone a different procedure to fuse a different joint in the  
13 foot. This formed the incorrect perception in his mind that he would have a good range of motion in  
14 his ankle following fusion, which sets out to stiffen the joint by definition. None the less there are 26  
15 joints in the foot and ankle, and even if the ankle joint itself is stiffened, the adjacent joints remain  
16 mobile giving the impression of good motion in the ankle after fusion.  
17  
18  
19  
20  
21  
22  
23  
24  
25  
26

27 The third major source of information in terms of influence was the Internet. All patients used the  
28 Internet to search for information on the procedures, and on other patient experiences.  
29  
30  
31

32 *“You have to make sure the information you find is reliable but I was largely reading stuff*  
33 *from medical journals and websites from institutions that specialise in ankle*  
34 *replacement.”(Patient 6)*  
35  
36  
37

38 The effectiveness of the internet to find information could at times be overwhelming and some  
39 participants found it hard to limit their searches.  
40  
41

42 *“The internet is big and too scary because you don’t know enough, anyone can say anything”*  
43 *(Patient 5)*  
44  
45  
46

47 Internet forums were often accessed and appear to represent a widening of the peer-influence on the  
48 patient. Using this part of the Internet allowed the participants direct contact with other patients, who  
49 had undergone the same operation.  
50  
51  
52

53 *“I went onto a forum to try and gather other people’s experiences, I found it very*  
54 *useful.”(Patient 1)*  
55  
56  
57  
58  
59  
60

1  
2  
3 A common theme was a difficulty in knowing how to ensure credibility of the information source.  
4  
5 The strength attributed to the surgeon's advice was demonstrated when it overruled other, conflicting  
6  
7 information sources.  
8

9  
10 *"I always check any new information with my surgeon. I trust what he tells me over anyone*  
11 *else, he sees this all the time and knows best."*(Patient 12)  
12

13  
14 Overall, the internet was rated by patients as having the least influence on deciding what operation to  
15  
16 have, while the treating surgeon was the most influential. The influence of friends and family appears  
17  
18 to feature more in the final theme.  
19

### 20 21 22 23 ***Theme 3: How patients decide the best option for them*** 24

25  
26 Patients make decisions based on their own summary of all the information available to them coupled  
27  
28 with the sounding and guidance from their immediate friends and family, as well as the practicalities  
29  
30 of their home and work situation. Patients realised that in the short term both surgical options would  
31  
32 provide them with good pain relief, which in most cases is a correct assumption.<sup>18</sup> However, one key  
33  
34 factor influencing patient choice related to the individual's adversity to risk. Patients with an inherent  
35  
36 risk aversion, found it difficult to accept anything new and selected their treatment based on the  
37  
38 lowest risk and the most predictable outcome.  
39

40  
41 *"If had replacement I would be looking at another operation ten years down the line, with a*  
42 *fusion I can have one operation and still have a good quality of life and get back to*  
43 *work."*(Patient 8)  
44  
45  
46

47  
48 Indeed the cumulative annual failure rate for ankle replacements is 1.9% per year<sup>19</sup> and in patients  
49  
50 who want certainty this was seen as a significant barrier. In contrast patients willing to accept risk,  
51  
52 found that certainty was in some cases unpalatable. Instead, they did not mind the risk of further  
53  
54 surgery providing their choice offered them greater immediate benefits.  
55  
56  
57  
58  
59  
60

1  
2  
3 *“I think a replacement would be best for me as I want to be active, even though I understand*  
4 *that I might need further surgery at a later date.” (Patient 10)*  
5  
6

7 Both patient groups viewed ankle fusion as a “final” (patients 2 and 4) option, after which there were  
8 no other alternatives. Although there are surgeons that have performed ankle replacement after fusion,  
9  
10  
11  
12<sup>20,21</sup> in the main, most surgeons would not recommend it, as results are generally poor.  
13

## 14 Discussion

15  
16  
17  
18  
19  
20 More than 5 million elective admissions for surgery take place in the UK each year<sup>22</sup>. In most cases  
21 more than one surgical treatment is available and it is therefore crucial to better understand how  
22 patients decide between different surgical treatments. Whilst there have been previous studies  
23 exploring the factors that influence patient decision making in medical situations<sup>23</sup> and when to opt  
24 for surgery<sup>6,24</sup>, our study is the first to assess not just why patients elect to undergo an intervention,  
25  
26  
27  
28  
29  
30 but at how they decide between two orthopaedic types of surgery in the face of surgeon equipoise.  
31

32 Three main sources of information emerged of which the surgeon was the most influential factor,  
33 followed by peer influence, and finally the media. The command of the surgeon has been described  
34 previously,<sup>25,26</sup> and even information gathered from other sources, invariably is proffered to the  
35 surgeon as final key validator. Although decision aides have been shown to be of great value,<sup>27</sup> and  
36  
37  
38  
39  
40  
41  
42  
43  
44  
45  
46  
47  
48  
49  
50  
51  
52  
53  
54  
55  
56  
57  
58  
59  
60  
most patients in our group had utilised such aides, during our interviews no patients elected to  
mention such aides as being an influencer on their decision making.

During this study surgeons had no treatment preference. None the less the participating patients made  
it clear that the surgeons' views had profound effects on their decision-making. Previous work has  
shown preferences can be asserted in other non-verbal ways.<sup>28,29</sup> For example the surgeons'  
cognizance of their patients' needs and expectations will tailor the delivery of information. This  
serves to establish rapport as a more patient-centred approach, but it can make the communication of  
a balanced view problematic.<sup>29</sup> Hudak has shown that surgeons orient to their professional identity,

1  
2  
3 which in our study maybe a proponent of ankle fusion or ankle replacement.<sup>28</sup> Further, Hudak showed  
4 that when surgeons talked about surgery versus no-surgery, surgery was portrayed as having a special,  
5 privileged status relative to other options; this resulted in asymmetry in the delivery of information.<sup>28</sup>  
6  
7 The concept of subtle hierarchical delivery of information may be applicable to ankle replacement and  
8 fusion, but we would only be able to confirm this through conversational analysis, which was within  
9 the scope of this paper.  
10  
11  
12  
13  
14  
15  
16  
17

18 The expression of treatment preference by the surgeon and patient are key tenets of shared decision  
19 making (SDM). In reality the complex and evolving nature of the patient-surgeon relationship results  
20 in a hybrid type consultation, for example as knowledge is gained by the patient the process may start  
21 as SDM and evolve in an informed type.<sup>2</sup> Decision making is distributed over time and involves  
22 many sources of information (human and non-human),<sup>30</sup> a finding echoed by our patient group.  
23  
24 However, despite the other sources weighing in, the surgeon continued to be the final validator of any  
25 other information gleaned outside the consultation room. This idea also extended to other members of  
26 his team who were simply used additional reference points. Our work adds further weight to the idea  
27 of decisions being “distributed” over time and people.  
28  
29  
30  
31  
32  
33  
34  
35  
36  
37  
38

39 Health policy in the UK has been influenced by high profile incidents such as the “The Bristol Case.”  
40 This has resulted in increased scrutiny from within the profession and from outside.<sup>31</sup> As clinicians we  
41 have a duty to protect and promote the health of our patients<sup>32</sup>. The profession has acted by  
42 introducing revalidation<sup>33</sup> and in orthopaedics, the UK has been proactive in creating the world’s  
43 largest National Joint Registry, recording every hip, knee, ankle and shoulder replacement implanted  
44 in England and Wales and containing in excess of 1.5m records.<sup>34</sup> In the future, surgeon-level  
45 reported outcome data is a possibility.<sup>35</sup> Aside from publicly available information, public scrutiny  
46 often manifests in patients seeking second opinions<sup>6</sup> as took place with several patients interviewed  
47 in this study. The Internet is also fast becoming a key driver of healthcare<sup>36</sup> and although this is well  
48 described in young populations,<sup>25</sup> it also affects the more mature patients, including octogenarians in  
49  
50  
51  
52  
53  
54  
55  
56  
57  
58  
59  
60

1  
2  
3 this study. Importantly, however, this study also identifies that patients are aware of the limitations  
4  
5 and risks associated with information from the Internet, a finding which is in line with other  
6  
7 groups,<sup>25,26,37</sup> and invariably turned to their surgeon for validation. Peer-influence from other patients  
8  
9 remains important, but the divide between peer-influence and the Internet is blurring with the use of  
10  
11 web forums<sup>38</sup> where accounts of patients who have undergone surgery seem highly persuasive and  
12  
13 empowering,<sup>39</sup> despite the potential to deliver an unbalanced, inaccurate and hence dangerous view.  
14  
15 Peer-influence was also described by McKinley in 1973<sup>40</sup> who also highlighted concerns as different  
16  
17 “*lay consultants*” perceive problems differently and consequently, give differing advice, and that the  
18  
19 context in which advice was given influenced its weighting.<sup>40</sup> For example, information given in a  
20  
21 hospital forum, web group or in a social gathering might have different meanings. We found the most  
22  
23 influential of peers were patients who had undergone the procedures in question.  
24  
25

26  
27 Qualitative research employs smaller samples than randomised-controlled trials. In this study the  
28  
29 sample size (n=14) was determined firstly, by purposively selecting participants who each could  
30  
31 provide exhaustive data, and secondly by continuing to interview until ‘data saturation’ was  
32  
33 achieved.<sup>13</sup> This became noticeable when during the last three interviews no new themes emerged,  
34  
35 and so data collection ceased. It is therefore unlikely that a larger sample would have provided a  
36  
37 bigger picture or different result. RCT’s offer generalisability of their results, qualitative research does  
38  
39 not. Nevertheless, the findings in this study raise issues that are of great importance to this specific  
40  
41 patient group. The role of the surgeon, peer-influence and the internet might have wider implications  
42  
43 in other chronic conditions beyond ankle arthritis, but further research would be needed to confirm  
44  
45 this.  
46  
47

48  
49 A further limitation of this study was that it was carried out in a single specialist centre, which could  
50  
51 be argued as not being representative of patients seen in the community or at a district general  
52  
53 hospital. None the less in this centre all patients had been appropriately counselled by surgeons who  
54  
55 have a clear understanding of both treatment options and provided in their opinion, a complete set of  
56  
57  
58  
59  
60



1  
2  
3 unbiased information to guide their patient's decision making. Since one third of orthopaedic foot and  
4 ankle surgeons in the UK do not carry out ankle replacement<sup>41</sup>, it is possible that patients from other  
5 centres, might not be offered such unbiased information, and this would undoubtedly influence their  
6 decision. This was evidenced in our study by feedback from patients who had sought a second opinion  
7 because they did not feel they had been provided with all of the information they needed at the initial  
8 hospital.

## 18 Conclusion

20 Patients seek knowledge from a wealth of sources including the Internet, web forums, and other  
21 patients. Whilst they leverage family and friends to guide decision making, the most important and  
22 influential factor in governing how patients decide on a particular surgical intervention is their  
23 surgeon. Other groups have shown how a surgeon's personal preferences and inclinations can  
24 dominate the patient's decision. Therefore clear and balanced, evidence-based information is crucial  
25 to allow patients to make an informed choice. Good communication by the surgeon assists in the  
26 development of a high quality doctor-patient relationship and will enable shared decision-making to  
27 become a reality.

## Tables

|   | Question                                                                                             | Focus                          |
|---|------------------------------------------------------------------------------------------------------|--------------------------------|
| 1 | Could you please explain your ankle problem to me.                                                   | Knowledge of ankle arthritis   |
| 2 | How did you find information about your ankle condition?                                             | Acquiring information          |
| 3 | Where did the information come from?                                                                 |                                |
| 4 | How did you find that information?                                                                   |                                |
| 5 | What did you find out about it?                                                                      | Knowledge of ankle arthritis   |
| 6 | What can you tell me about the treatment options you have?                                           | Knowledge of treatment options |
| 7 | How did you find out about these treatment options?                                                  | Acquiring information          |
| 8 | What do you think about the treatment options you have? What are their advantages and disadvantages? | Personal treatment preferences |

Table 1

## References

- Health Do.** Liberating the NHS: No decision about me, without me. Department of Health, 2012.
- Charles C, Whelan T, Gafni A.** What do we mean by partnership in making decisions about treatment? *BMJ* 1999;319-7212:780-2.
- Beauchamp T, Childress J.** *Principles of biomedical ethics*. 5th ed.: Oxford University Press, 2001.
- Charles C, Gafni A, Whelan T.** Shared decision-making in the medical encounter: what does it mean? (or it takes at least two to tango). *Soc Sci Med* 1997;44-5:681-92.
- Lurie JD, Weinstein JN.** Shared decision-making and the orthopaedic workforce. *Clin Orthop Relat Res* 2001-385:68-75.
- Clark JP, Hudak PL, Hawker GA, Coyte PC, Mahomed NN, Kreder HJ, Wright JG.** The moving target: a qualitative study of elderly patients' decision-making regarding total joint replacement surgery. *J Bone Joint Surg Am* 2004;86-A-7:1366-74.
- McHugh GA, Luker KA.** Influences on individuals with osteoarthritis in deciding to undergo a hip or knee joint replacement: a qualitative study. *Disabil Rehabil* 2009;31-15:1257-66.
- Courville XF, Hecht PJ, Tosteson AN.** Is total ankle arthroplasty a cost-effective alternative to ankle fusion? *Clin Orthop Relat Res* 2011;469-6:1721-7.
- Haddad SL, Coetzee JC, Estok R, Fahrback K, Banel D, Nalysnyk L.** Intermediate and long-term outcomes of total ankle arthroplasty and ankle arthrodesis. A systematic review of the literature. *J Bone Joint Surg Am* 2007;89-9:1899-905.
- Saltzman CL, Zimmerman MB, O'Rourke M, Brown TD, Buckwalter JA, Johnston R.** Impact of comorbidities on the measurement of health in patients with ankle osteoarthritis. *J Bone Joint Surg Am*. 2006;88-11:2366-72.

- 1  
2  
3 **11. Glazebrook M, Daniels T, Younger A, Foote CJ, Penner M, Wing K, Lau J, Leighton R, Dunbar M.** Comparison of health-related quality of life between patients with end-stage ankle and  
4 hip arthrosis. *J Bone Joint Surg Am* 2008;90-3:499-505.
- 5 **12. Goldberg AJ, Macgregor A, Dawson J, Singh D, Cullen N, Sharp RJ, Cooke PH.** The demand  
6 incidence of symptomatic ankle osteoarthritis presenting to foot & ankle surgeons in the United  
7 Kingdom. *Foot* 2012;22-3:163-6.
- 8 **13. Guest G, MacQueen KM, Namey EE.** *Applied Thematic Analysis*. Los Angeles: Sage, 2012.
- 9 **14. Braun V, Clarke V.** Using thematic analysis in psychology. *Qualitative research in Psychology*  
10 2006;3:77-101.
- 11 **15. Lincoln Y, Guba E.** *Naturalistic Inquiry*. Newbury Park, CA: Sage Publications, 1985.
- 12 **16. Harrington KD.** Degenerative arthritis of the ankle secondary to long-standing lateral ligament  
13 instability. *J Bone Joint Surg Am*. 1979;61-3:354-61.
- 14 **17. Valderrabano V, Horisberger M, Russell I, Dougall H, Hintermann B.** Etiology of ankle  
15 osteoarthritis. *Clin Orthop Relat Res* 2009;467-7:1800-6.
- 16 **18. Slobogean GP, Younger A, Apostle KL, Marra CA, Wing K, Penner M, Daniels T, Glazebrook M.** Preference-based quality of life of end-stage ankle arthritis treated with arthroplasty  
17 or arthrodesis. *Foot Ankle Int* 2010;31-7:563-6.
- 18 **19. Zaidi R, Cro S, Gurusamy K, Siva N, Macgregor A, Henricson A, Goldberg A.** Outcomes of  
19 Primary Modern Total Ankle Replacements – A Systematic Review and Meta-Analysis  
20  
21 UCL Institute of Orthopaedics and Musculoskeletal Science, 2013.
- 22 **20. Hintermann B, Barg A, Knupp M, Valderrabano V.** Conversion of painful ankle arthrodesis to  
23 total ankle arthroplasty. *Journal of Bone & Joint Surgery - American Volume*;91-4:850-8.
- 24 **21. Greisberg J, Assal M, Flueckiger G, Hansen ST, Jr.** Takedown of ankle fusion and conversion  
25 to total ankle replacement. *Clin.Orthop.Relat Res*. 2004-424:80-8.
- 26 **22.** Listed NA. <http://www.hesonline.nhs.uk> (accessed).
- 27 **23. Morton RL, Tong A, Howard K, Snelling P, Webster AC.** The views of patients and carers in  
28 treatment decision making for chronic kidney disease: systematic review and thematic synthesis of  
29 qualitative studies. *BMJ* 2010;340:c112.
- 30 **24. O'Neill T, Jinks C, Ong BN.** Decision-making regarding total knee replacement surgery: a  
31 qualitative meta-synthesis. *BMC Health Serv Res* 2007;7:52.
- 32 **25. Davies E, Yeoh KW.** Internet chemotherapy information: impact on patients and health  
33 professionals. *Br J Cancer* 2012;106-4:651-7.
- 34 **26. Xie B.** Older adults' health information wants in the internet age: implications for patient-provider  
35 relationships. *J Health Commun* 2009;14-6:510-24.
- 36 **27. Stacey D, Bennett CL, Barry MJ, Col NF, Eden KB, Holmes-Rovner M, Llewellyn-Thomas  
37 H, Lyddiatt A, Légaré F, Thomson R.** Decision aids for people facing health treatment or screening  
38 decisions. *Cochrane Database Syst Rev* 2011-10:CD001431.
- 39 **28. Hudak PL, Clark SJ, Raymond G.** The Omni-Relevance of Surgery: How Medical  
40 Specialization Shapes Orthopedic Surgeons' Treatment Recommendations. *Health Commun* 2012.
- 41 **29. Hudak PL, Clark SJ, Raymond G.** How surgeons design treatment recommendations in  
42 orthopaedic surgery. *Soc Sci Med* 2011;73-7:1028-36.
- 43 **30. Rapley T.** Distributed decision making: the anatomy of decisions-in-action. *Sociol Health Illn*  
44 2008;30-3:429-44.
- 45 **31. Smith R.** All changed, changed utterly. British medicine will be transformed by the Bristol case.  
46 *BMJ* 1998;316-7149:1917-8.
- 47 **32.** Listed NA. [http://www.gmc-uk.org/guidance/good\\_medical\\_practice/duties\\_of\\_a\\_doctor.asp](http://www.gmc-uk.org/guidance/good_medical_practice/duties_of_a_doctor.asp)  
48 (accessed).
- 49 **33.** Listed NA. Revalidation: what you need to do. General Medical Council, 2012.
- 50 **34.** Listed NA. Public and Patient Guide to the NJR Annual Report 2012.  
51 <http://www.njrcentre.org.uk>, 2012.
- 52 **35.** Hill M. <http://www.bbc.co.uk/news/health-20584897> (accessed).
- 53 **36. Impicciatore P, Pandolfini C, Casella N, Bonati M.** Reliability of health information for the  
54 public on the World Wide Web: systematic survey of advice on managing fever in children at home.  
55 *BMJ* 1997;314-7098:1875-9.
- 56  
57  
58  
59  
60

- 1  
2  
3 **37. Smith JT, Pate OL, Guss D, Lee JT, Chiodo CP, Bluman EM.** Internet information quality for  
4 ten common foot and ankle diagnoses. *Foot Ankle Surg* 2012;18-3:198-202.  
5 **38. Preece J.** Emphatic communities: balancing emotional and factual communication. *Interacting*  
6 *with Computers* 1999;12-1:63-77.  
7 **39. van Uden-Kraan CF, Drossaert CH, Taal E, Seydel ER, van de Laar MA.** Participation in  
8 online patient support groups endorses patients' empowerment. *Patient Educ Couns* 2009;74-1:61-9.  
9 **40. McKinlay J.** Social Networks, Lay Consultation and Help-Seeking Behavior. *Social Forces*  
10 1973;51-3:275-92.  
11 **41. Goldberg AJ, Sharp RJ, Cooke P.** Ankle replacement: current practice of foot & ankle surgeons  
12 in the United kingdom. *Foot Ankle Int* 2009;30-10:950-4.  
13  
14  
15  
16  
17  
18  
19  
20  
21  
22  
23  
24  
25  
26  
27  
28  
29  
30  
31  
32  
33  
34  
35  
36  
37  
38  
39  
40  
41  
42  
43  
44  
45  
46  
47  
48  
49  
50  
51  
52  
53  
54  
55  
56  
57  
58  
59  
60

For peer review only

# How do patients with end-stage ankle arthritis make decisions between two different surgical treatments? A Qualitative Study

Mr Razi Zaidi<sup>1</sup> BSc MBBS MRCS

Dr Michael Pfeil<sup>2</sup> PhD RN

Prof Alexander J Macgregor<sup>1</sup> MA, MD, PhD, FRCP

Mr Andy Goldberg<sup>1</sup> OBE MD FRCS(Tr&Orth)

Correspondence to Razi Zaidi, razizaidi@doctors.net.uk

---

<sup>1</sup> UCL Institute of Orthopaedics and Musculoskeletal Science (IOMS)  
Royal National Orthopaedic Hospital (RNOH),  
Brockley Hill,  
Stanmore HA7 4LP

<sup>2</sup> University of East Anglia  
Faculty of Medicine and Health Sciences  
Edith Cavell Building 2.15  
Norwich Research Park  
Norwich  
NR4 7TJ  
UK

## Copyright for authors

The Corresponding Author has the right to grant on behalf of all authors and does grant on behalf of all authors, a worldwide licence to the Publishers and its licensees in perpetuity, in all forms, formats and media (whether known now or created in the future), to i) publish, reproduce, distribute, display and store the Contribution, ii) translate the Contribution into other languages, create adaptations, reprints, include within collections and create summaries, extracts and/or, abstracts of the Contribution, iii) create any other derivative work(s) based on the Contribution, iv) to exploit all subsidiary rights in the Contribution, v) the inclusion of electronic links from the Contribution to third party material where-ever it may be located; and, vi) licence any third party to do any or all of the above.

## Conflict of Interest

We have read and understood the BMJ Group policy on declaration of interests and have no relevant interests to declare.

## Authorship

All of the four authors listed were involved in conception, design, analysis and interpretation of generated data. Additionally all were involved in drafting, revising and final approval of the version to be published.

## Abstract

**Objective** To examine how patients decide between **ankle fusion and ankle replacement in end-stage ankle arthritis**.

**Design** Purposive patient selection, **semi-structured interviews, thematic analysis**.

**Setting** Royal National Orthopaedic Hospital, Stanmore, UK.

**Participants** 14 patients diagnosed with end-stage ankle osteoarthritis.

**Results** We interviewed 6 male and 8 female with a mean age of 58 years (range 41 to 83). All had opted for surgery after failure of at least 6 months of conservative management, sequentially trading-off daily activities to limit evolving pain. To decide between two offered treatments of ankle fusion and total ankle replacement (TAR) three major sources informed the patients decision making process; their surgeon; peers; and the media. The treating surgeon was viewed as the most reliable and influential source of information. Information gleaned from other patients was also important but carries risks as does information gleaned from the Internet and grey media, both of which invariably required validation by the surgeon and in some cases the GP.

**Conclusions** Patients seek knowledge from a wealth of sources including the Internet, web forums, and other patients. Whilst they leverage each of these sources to guide decision making, the most important and influential factor in governing how patients decide on any particular surgical intervention is their surgeon. A high quality doctor-patient relationship, coupled with clear, balanced and complete information is essential to enable shared decision-making to become a standard model of care.

## Article Summary

### Article Focus

- Qualitative assessment of how patients with end stage osteoarthritis of the ankle decide between surgical interventions offered to them.
- Discuss the sources of information patient's use to aid their decision-making.

### Key Message

- The surgeon, the Internet and peers influence patients in their decision making but the surgeon appeared to be the most valued source of information.

### Strengths and limitations of this study

- The strengths include this being the first study to take a qualitative look at how patients decide between ankle fusion and ankle replacement to treat end stage ankle osteoarthritis.
- The limitations include sampling from a single specialist centre and the relatively small sample size although data saturation was reached.

## Introduction

The UK National Health Service (NHS) has adopted a philosophy of “*no decision about me, without me*”, moving away from a paternalistic model of decision-making towards a shared decision-making process between patient and clinician.<sup>1</sup> This ideal is the foundation of high-quality healthcare and is especially important in the context of long-term conditions and chronic illness, such as osteoarthritis.

**Patient and doctor interactions are underpinned by three main decision making models,<sup>2</sup> these being paternalistic, informed and shared.**



1  
2  
3 The paternalistic model assumes the doctor knows best. It is characterised by the passive  
4 compliance of the patient to the authority of the surgeon, who is the custodian of the patient's  
5 best interest. As a result decisions may even be counter to the patient's wishes, as long as the  
6 patient is perceived to benefit.<sup>3</sup> This approach is less desirable in the setting of elective surgery  
7 but still has its applications in trauma and life threatening situations, where patients may  
8 present acutely with altered consciousness or mental state.  
9  
10  
11  
12  
13  
14

15  
16  
17 At the other end of the spectrum is the informed model, where all decisions are made by the  
18 patient. The role of the doctor is to deliver to the patient information on all relevant treatment  
19 options including their benefits and risks. Communication in this model is one way.<sup>2</sup>  
20  
21  
22  
23  
24

25 Shared decision making (SDM) is a two way interaction where the doctor and patient share all  
26 stages of the decision making process simultaneously and reach a decision together.<sup>4</sup> This is the  
27 ideal held by the NHS and affords many advantages in the orthopaedics setting. SDM increases  
28 patient knowledge and understanding, and creates more accurate expectations. It allows for  
29 better tailoring of treatment to patient values and has been shown to result in higher  
30 satisfaction.<sup>5</sup>  
31  
32  
33  
34  
35  
36  
37  
38  
39

40 Decision making has been examined in orthopaedic surgery mainly in the context of hip and  
41 knee joint replacement. The majority of the work has centred on the decision of whether to  
42 undergo surgery or not.<sup>6,7</sup> We chose to look at a different question, namely as to how patients  
43 that have decided to undergo surgery, decide between different treatment options. The model  
44 we have used pertains to patients with end-stage ankle osteoarthritis.  
45  
46  
47  
48  
49  
50  
51

52 We believe that ankle osteoarthritis is a good model to study because there are two accepted  
53 surgical treatments, ankle fusion, and total ankle replacement (TAR), both of which have been  
54 shown to be valid and cost effective treatments<sup>8</sup> with a degree of clinical equipoise between  
55  
56  
57  
58  
59  
60

1  
2  
3 **them.**<sup>9</sup> Osteoarthritis of the ankle is a major cause of disability with an impact on quality of life  
4 similar to end-stage heart failure<sup>10</sup> and hip arthritis.<sup>11</sup> Its demand incidence has been recently  
5 estimated to be 47.7 per 100,000 in the UK.<sup>12</sup> The majority of cases of ankle osteoarthritis are  
6 secondary to trauma or other diseases such as inflammatory arthritis.<sup>12</sup> **The aim of this paper is to**  
7 **carry out a qualitative study that explores how patients who have decided that they want to**  
8 **undergo surgery, make decisions between these two treatments.**

## 19 **Methods and Materials**

20  
21 This study took a qualitative, interview-based approach to explore and analyse how patients' with  
22 severe ankle osteoarthritis decide between two different surgical treatments, ankle fusion and TAR.  
23  
24  
25  
26  
27

### 28 **Sample**

29  
30 The study was based at the Royal National Orthopaedic Hospital NHS Trust, Stanmore, UK, a  
31 specialist hospital, which offers both ankle fusion and TAR as standard treatment options. Patients  
32 diagnosed with end-stage ankle osteoarthritis were purposively recruited prior to their outpatient visit  
33 to discuss their surgical treatment. **Our inclusion criteria were patients of all ages with ankle**  
34 **osteoarthritis (diagnosed by clinical history and plain radiography) who had tried at least 6**  
35 **months of non-operative treatment, and whom were suitable for either a TAR or fusion and had**  
36 **opted for operative intervention but were undecided between the two treatment options. The**  
37 **patients were given verbal and written information pertaining survivorship, function,**  
38 **complications and post-operative rehabilitation relating to both treatments. Skeletal models and**  
39 **pictures were used during the consultation to support verbal information conveyed, and all**  
40 **patients were provided with a written patient information sheet, as aides to decision making.**  
41 **Interviews took place prior to the second appointment, which served as a platform for them to**  
42 **declare their treatment choice. We excluded patients who were only suitable for one of the**  
43  
44  
45  
46  
47  
48  
49  
50  
51  
52  
53  
54  
55  
56  
57  
58  
59  
60

1  
2  
3 interventions, or had declined surgery. Patients were approached directly (by RZ and AG) in  
4 clinic and the purpose of the study was explained to each patient. Following a ‘cooling-down’  
5 period of 72 hours patients were asked if they remained happy to participate in the study.  
6  
7  
8 Recruitment continued until data saturation became noticeable during the last three interviews.  
9

### 10 11 12 13 *Data collection and analysis*

14  
15  
16  
17 Following informed consent all participants underwent face-to-face, semi-structured interviews  
18 (n=14). The interviews were conducted by one of the authors (RZ) in the outpatient  
19 department. An interview guide was used. It consisted of open-ended questions and was based  
20 on the research objective and existing literature (Table 1). The schedule focused on the patients’  
21 experience of the condition, the information sources they had used, the treatment options open to them  
22 and their preferences. The interviews lasted between 45 and 60 minutes; they were audio-recorded  
23 and transcribed verbatim.  
24  
25  
26  
27  
28  
29  
30  
31  
32  
33

34 The data was analysed inductively by RZ and MP, using thematic analysis<sup>13</sup>. This is a highly  
35 flexible analytical method capable of producing the detailed and systematic account of the issues  
36 and opinions contained within in the data that was required for this study.<sup>14</sup> The first analytical  
37 step involved repeatedly reading the interview transcripts and becoming familiar with the  
38 content. This allowed initial patterns and codes to emerge from the text. During the subsequent  
39 line-by-line analysis, these codes were refined and grouped into themes. Each theme was  
40 described in rich detail and interpreted. Themes were eventually interlinked within a comprehensive  
41 categorisation system. Finally, in order to validate our results a process of peer-debriefing<sup>15</sup> was also  
42 employed. This meant that the remaining authors (AG, AM) questioned the analytical results  
43 requiring their justification based on the original data.  
44  
45  
46  
47  
48  
49  
50  
51  
52  
53  
54  
55  
56  
57

### 58 *Ethical issues*

1  
2  
3 This work was approved locally through the R&D Institutional Review Board at the Royal National  
4 Orthopaedic Hospital NHS Trust, who confirmed that as these interviews were carried out as part of a  
5 wider service evaluation no formal ethical approval was required. Nevertheless, ethical procedures  
6 were strictly adhered to including the provision of full written participant information enabling  
7 informed consent and by assuring that strict participant anonymity was maintained, for example by  
8 allocating numeric codes to all participant contributions. All participants were aware that they could  
9 stop taking part at any time.  
10  
11  
12  
13  
14  
15  
16

## 20 Results

21  
22  
23 A total of 14 patients (6 male and 8 female), each with a diagnosis of ankle osteoarthritis were  
24 purposively recruited. All participants had suffered with ankle arthritis for between 10-40 years and  
25 all had tried at least 6 months of non-operative measures prior to being referred. All patients had  
26 developed a good understanding of their condition and current state over many years using a wide  
27 variety of information sources.  
28  
29  
30  
31  
32

33  
34 **“I have osteoarthritis in the ankle possibly due to a fracture of the tibia and fibula I had**  
35 **many years ago. This had led to the wearing away of cartilage in the joint, which creates**  
36 **pain.”(Patient 6)**  
37  
38  
39

40 Indeed the commonest cause of osteoarthritis of the ankle is following trauma such as severe sprains<sup>16</sup>  
41 or fractures of the ankle.<sup>17</sup> We have divided our findings into three broad themes:  
42  
43  
44  
45  
46  
47

### 48 *Theme 1: Why patients opt for surgery*

49  
50 All patients in our sample had unsuccessfully tried non-operative treatment. Hence persistent pain and  
51 failure of non-operative measures were the dominant reason for surgery, frequently described as  
52 “horrendous” (Patient 2) or “unbearable” (Patient 1). All patients described a sequential process of  
53 activity reduction as a result of worsening pain.  
54  
55  
56  
57  
58  
59  
60

1  
2  
3           *"You live with the pain and restrict your lifestyle to cope with it, until you can't cope. So I*  
4  
5           *now need an operation."* (Patient 1)  
6

7  
8 This trade-off process eventually concluded with one of two events that preceded the decision to  
9  
10 undergo surgery. The first arose when the participants had become so restricted by the pain that they  
11  
12 were unable to function or work and had no further activities to trade-off, and the second when they  
13  
14 were forced to give up a specific activity that was very important to them. One participant was  
15  
16 particularly keen to return to dancing and asserted that this was her main impetus for surgical  
17  
18 intervention. Overall recreational activities were an important theme and participants anticipated some  
19  
20 return to them post-surgery.  
21

22           *"Squash, golf, I can't do any of them now; the only activity I can do is swimming. I have put a*  
23  
24           *lot of weight on as a result of not being able to do what I used to; I just hope to get back to*  
25  
26           *doing something."* (Patient 9)  
27

28  
29 In some cases, the worry of spreading pain was an impetus to proceed with surgery.  
30

31           *"It's affecting my other joints, my knee and my back, so I just want to get the ankle sorted to*  
32  
33           *take the pressure off the rest."* (Patient 11)  
34

35  
36 Several patients felt that other joints were painful as a result of their ankle and this appeared to  
37  
38 contribute to their decision to proceed with surgery in a hope they could prevent or ease these  
39  
40 symptoms.  
41

42  
43  
44  
45 The ability to work was a key factor that not only induced a perceived need for surgical intervention,  
46  
47 it could also result in patients initially declining surgery. In these cases loss of earnings during the  
48  
49 post-operative rest period was raised as the reason for putting off surgery. This represents a 'worker's  
50  
51 paradox' as surgery is required to continue in employment, but the temporary loss of earnings during  
52  
53 the recovery period is seen as being prohibitive.  
54  
55  
56  
57  
58  
59  
60

## *Theme 2: Information sources for decision making*

Three major source of information emerged from our study; healthcare professionals; peer influence; and the media. The patients in our sample reported good relationships with their current surgeons and rated the information provided by them as the highest influence in deciding between operations because of its perceived reliability.

*“Speaking to the consultant and team has had the most impact on my decision making.” (Patient 7)*

The role of the general practitioner differed depending on the relationship between patient and GP.

*“I go to my GP with the letter from the surgeon and find it helpful to talk through the letter with someone I am close to.” (Patient 13)*

Where the relationship between patient and GP was strong, GPs were frequently used as sounding boards, but where the relationship was poor, the role of the GP as merely that of a gate keeper.

*“I don’t ever see the same GP twice. I don’t see any role for my GP other than to refer me.” (Patient 14)*

Indeed, rapport between patient and surgeon was also key. This distinction became clear in cases where patients had been referred on for second opinions.

*“I didn’t have confidence in the first surgeon, so I sought a second opinion” (Patient 1)*

Similarly the lack of treatment options by a centre would influence some patients.

*“The surgeon I initially saw only offered fusion and I didn’t feel I had all the information I needed, so I sought a second opinion.” (Patient 4)*

Peer influence was the second most significant factor that shaped decision-making.

*“I had [famous sportsman] in my cab and he told me he had an ankle fusion, with a great result, so I decided if it’s good enough for him, then its good enough for me” (Patient 7)*

1  
2  
3 Equally, reports of substandard outcomes could result in the formation of negative perceptions.  
4

5 *“I asked a friend of mine who had the operation; she said it extremely painful so that made*  
6 *me reconsider.”(Patient 3)*  
7  
8  
9

10 Peer influence also has the potential to mislead when patients mistakenly compare themselves to  
11 others who have undergone a different operation. In our sample one patient undergoing ankle fusion  
12 took peer-advice from a friend who had undergone a different procedure to fuse a different joint in the  
13 foot. This formed the incorrect perception in his mind that he would have a good range of motion in  
14 his ankle following fusion, which sets out to stiffen the joint by definition. **None the less there are**  
15 **26 joints in the foot and ankle, and even if the ankle joint itself is stiffened, the adjacent joints**  
16 **remain mobile giving the impression of good motion in the ankle after fusion.**  
17  
18  
19  
20  
21  
22  
23  
24  
25  
26

27 The third major source of information in terms of influence was the Internet. All patients used the  
28 Internet to search for information on the procedures, and on other patient experiences.  
29  
30

31 *“You have to make sure the information you find is reliable but I was largely reading stuff*  
32 *from medical journals and websites from institutions that specialise in ankle*  
33 *replacement.”(Patient 6)*  
34  
35  
36  
37

38 The effectiveness of the internet to find information could at times be overwhelming and some  
39 participants found it hard to limit their searches.  
40  
41

42 *“The internet is big and too scary because you don't know enough, anyone can say anything”*  
43 *(Patient 5)*  
44  
45  
46

47 Internet forums were often accessed and appear to represent a widening of the peer-influence on the  
48 patient. Using this part of the Internet allowed the participants direct contact with other patients, who  
49 had undergone the same operation.  
50  
51  
52

53 *“I went onto a forum to try and gather other people's experiences, I found it very*  
54 *useful.”(Patient 1)*  
55  
56  
57  
58  
59  
60

1  
2  
3 A common theme was a difficulty in knowing how to ensure credibility of the information source.  
4  
5 The strength attributed to the surgeon's advice was demonstrated when it overruled other, conflicting  
6  
7 information sources.  
8

9  
10 *"I always check any new information with my surgeon. I trust what he tells me over anyone*  
11  
12 *else, he sees this all the time and knows best."* (Patient 12)  
13

14 Overall, the internet was rated by patients as having the least influence on deciding what operation to  
15  
16 have, while the treating surgeon was the most influential. The influence of friends and family appears  
17  
18 to feature more in the final theme.  
19

### 20 21 22 23 ***Theme 3: How patients decide the best option for them*** 24

25  
26 Patients make decisions based on their own summary of all the information available to them coupled  
27  
28 with the sounding and guidance from their immediate friends and family, as well as the practicalities  
29  
30 of their home and work situation. Patients realised that in the short term both surgical options would  
31  
32 provide them with good pain relief, which in most cases is a correct assumption.<sup>18</sup> However, one key  
33  
34 factor influencing patient choice related to the individual's adversity to risk. Patients with an inherent  
35  
36 risk aversion, found it difficult to accept anything new and selected their treatment based on the  
37  
38 lowest risk and the most predictable outcome.  
39

40  
41 *"If had replacement I would be looking at another operation ten years down the line, with a*  
42  
43 *fusion I can have one operation and still have a good quality of life and get back to*  
44  
45 *work."* (Patient 8)  
46

47  
48 Indeed the cumulative annual failure rate for ankle replacements is 1.9% per year<sup>19</sup> and in patients  
49  
50 who want certainty this was seen as a significant barrier. In contrast patients willing to accept risk,  
51  
52 found that certainty was in some cases unpalatable. Instead, they did not mind the risk of further  
53  
54 surgery providing their choice offered them greater immediate benefits.  
55



1  
2  
3 *"I think a replacement would be best for me as I want to be active, even though I understand*  
4 *that I might need further surgery at a later date."* (Patient 10)  
5  
6

7 Both patient groups viewed ankle fusion as a "final" (patients 2 and 4) option, after which there were  
8 no other alternatives. Although there are surgeons that have performed ankle replacement after fusion,  
9  
10  
11  
12<sup>20,21</sup> in the main, most surgeons would not recommend it, as results are generally poor.  
13

## 14 Discussion

15  
16  
17  
18  
19  
20 More than 5 million elective admissions for surgery take place in the UK each year<sup>22</sup>. In most cases  
21 more than one surgical treatment is available and it is therefore crucial to better understand how  
22 patients decide between different surgical treatments. Whilst there have been previous studies  
23 exploring the factors that influence patient decision making in medical situations<sup>23</sup> and when to opt  
24 for surgery<sup>6,24</sup>, our study is the first to assess not just why patients elect to undergo an intervention,  
25  
26  
27  
28  
29 but at how they decide between two orthopaedic types of surgery in the face of surgeon equipoise.  
30

31  
32 Three main sources of information emerged of which the surgeon was the most influential factor,  
33 followed by peer influence, and finally the media. The command of the surgeon has been described  
34 previously,<sup>25,26</sup> and even information gathered from other sources, invariably is proffered to the  
35 surgeon as final key validator. **Although decision aides have been shown to be of great value,<sup>27</sup>**  
36  
37  
38  
39  
40  
41  
42  
43  
44  
45  
46  
47  
48  
49  
50  
51  
52  
53  
54  
55  
56  
57  
58  
59  
60  
**and most patients in our group had utilised such aides, during our interviews no patients elected to mention such aides as being an influencer on their decision making.**

**During this study surgeons had no treatment preference. None the less the participating patients made it clear that the surgeons' views had profound effects on their decision-making. Previous work has shown preferences can be asserted in other non-verbal ways.<sup>28,29</sup> For example the surgeons' cognizance of their patients' needs and expectations will tailor the delivery of information. This serves to establish rapport as a more patient-centred approach, but it can makes the communication of a balanced view problematic.<sup>29</sup> Hudak has shown that surgeons**

1  
2  
3 orient to their professional identity, which in our study maybe a proponent of ankle fusion or  
4 ankle replacement.<sup>28</sup> Further, Hudak showed that when surgeons talked about surgery versus  
5 no-surgery, surgery was portrayed as having a special, privileged status relative to other  
6 options; this resulted in asymmetry in the delivery of information.<sup>28</sup> The concept of subtle  
7 hierarchical delivery of information may be applicable to ankle replacement and fusion, but we  
8 would only be able to confirm this through conversational analysis, which was within the scope  
9 of this paper.  
10  
11  
12  
13  
14  
15  
16  
17  
18  
19

20 The expression of treatment preference by the surgeon and patient are key tenets of shared  
21 decision making (SDM). In reality the complex and evolving nature of the patient-surgeon  
22 relationship results in a hybrid type consultation, for example as knowledge is gained by the  
23 patient the process may start as SDM and evolve in an informed type.<sup>2</sup> Decision making is  
24 distributed over time and involves many sources of information (human and non-human),<sup>30</sup> a  
25 finding echoed by our patient group. However, despite the other sources weighing in, the  
26 surgeon continued to be the final validator of any other information gleaned outside the  
27 consultation room. This idea also extended to other members of his team who were simply used  
28 additional reference points. Our work adds further weight to the idea of decisions being  
29 “distributed” over time and people.  
30  
31  
32  
33  
34  
35  
36  
37  
38  
39  
40  
41  
42

43 Health policy in the UK has been influenced by high profile incidents such as the “The Bristol Case.”  
44 This has resulted in increased scrutiny from within the profession and from outside.<sup>31</sup> As clinicians we  
45 have a duty to protect and promote the health of our patients<sup>32</sup>. The profession has acted by  
46 introducing revalidation<sup>33</sup> and in orthopaedics, the UK has been proactive in creating the world’s  
47 largest National Joint Registry, recording every hip, knee, ankle and shoulder replacement implanted  
48 in England and Wales and containing in excess of 1.5m records.<sup>34</sup> In the future, surgeon-level  
49 reported outcome data is a possibility.<sup>35</sup> Aside from publicly available information, public scrutiny  
50 often manifests in patients seeking second opinions<sup>6</sup> as took place with several patients interviewed  
51  
52  
53  
54  
55  
56  
57  
58  
59  
60

1  
2  
3 in this study. The Internet is also fast becoming a key driver of healthcare<sup>36</sup> and although this is well  
4 described in young populations,<sup>25</sup> it also affects the more mature patients, including octogenarians in  
5 this study. Importantly, however, this study also identifies that patients are aware of the limitations  
6 and risks associated with information from the Internet, a finding which is in line with other  
7 groups,<sup>25,26,37</sup> and invariably turned to their surgeon for validation. Peer-influence from other patients  
8 remains important, but the divide between peer-influence and the Internet is blurring with the use of  
9 web forums<sup>38</sup> where accounts of patients who have undergone surgery seem highly persuasive and  
10 empowering,<sup>39</sup> despite the potential to deliver an unbalanced, inaccurate and hence dangerous view.  
11 **Peer-influence was also described by McKinley in 1973<sup>40</sup> who also highlighted concerns as**  
12 **different “lay consultants” perceive problems differently and consequently, give differing**  
13 **advice, and that the context in which advice was given influenced its weighting.<sup>40</sup> For example,**  
14 **information given in a hospital forum, web group or in a social gathering might have different**  
15 **meanings. We found the most influential of peers were patients who had undergone the**  
16 **procedures in question.**

17  
18  
19  
20  
21  
22  
23  
24  
25  
26  
27  
28  
29  
30  
31  
32  
33  
34 Qualitative research employs smaller samples than randomised-controlled trials. In this study the  
35 sample size (n=14) was determined firstly, by purposively selecting participants who each could  
36 provide exhaustive data, and secondly by continuing to interview until ‘data saturation’ was  
37 achieved.<sup>13</sup> This became noticeable when during the last three interviews no new themes emerged,  
38 and so data collection ceased. It is therefore unlikely that a larger sample would have provided a  
39 bigger picture or different result. **RCT’s offer generalisability of their results, qualitative research**  
40 **does not. Nevertheless, the findings in this study raise issues that are of great importance to this**  
41 **specific patient group. The role of the surgeon, peer-influence and the internet might have**  
42 **wider implications in other chronic conditions beyond ankle arthritis, but further research**  
43 **would be needed to confirm this.**

1  
2  
3 A further limitation of this study was that it was carried out in a single specialist centre, which  
4 could be argued as not being representative of patients seen in the community or at a district  
5 general hospital. None the less in this centre all patients had been appropriately counselled by  
6 surgeons who have a clear understanding of both treatment options and provided in their  
7 opinion, a complete set of unbiased information to guide their patient's decision making. Since  
8 one third of orthopaedic foot and ankle surgeons in the UK do not carry out ankle  
9 replacement<sup>41</sup>, it is possible that patients from other centres, might not be offered such unbiased  
10 information ,and this would undoubtedly influence their decision. This was evidenced in our  
11 study by feedback from patients who had sought a second opinion because they did not feel they  
12 had been provided with all of the information they needed at the initial hospital.  
13  
14  
15  
16  
17  
18  
19  
20  
21  
22  
23  
24  
25  
26

## 27 Conclusion

28  
29 Patients seek knowledge from a wealth of sources including the Internet, web forums, and other  
30 patients. Whilst they leverage family and friends to guide decision making, the most important and  
31 influential factor in governing how patients decide on a particular surgical intervention is their  
32 surgeon. Other groups have shown how a surgeon's personal preferences and inclinations can  
33 dominate the patient's decision. Therefore clear and balanced, evidence-based information is crucial  
34 to allow patients to make an informed choice. Good communication by the surgeon assists in the  
35 development of a high quality doctor-patient relationship and will enable shared decision-making to  
36 become a reality.  
37  
38  
39  
40  
41  
42  
43  
44  
45  
46  
47  
48  
49  
50  
51  
52  
53  
54  
55  
56  
57  
58  
59  
60

## Tables

|   | Question                                                                                             | Focus                          |
|---|------------------------------------------------------------------------------------------------------|--------------------------------|
| 1 | Could you please explain your ankle problem to me.                                                   | Knowledge of ankle arthritis   |
| 2 | How did you find information about your ankle condition?                                             | Acquiring information          |
| 3 | Where did the information come from?                                                                 |                                |
| 4 | How did you find that information?                                                                   |                                |
| 5 | What did you find out about it?                                                                      | Knowledge of ankle arthritis   |
| 6 | What can you tell me about the treatment options you have?                                           | Knowledge of treatment options |
| 7 | How did you find out about these treatment options?                                                  | Acquiring information          |
| 8 | What do you think about the treatment options you have? What are their advantages and disadvantages? | Personal treatment preferences |

Table 1

## References

1. **Health Do.** Liberating the NHS: No decision about me, without me. Department of Health, 2012.
2. **Charles C, Whelan T, Gafni A.** What do we mean by partnership in making decisions about treatment? *BMJ* 1999;319-7212:780-2.
3. **Beauchamp T, Childress J.** *Principles of biomedical ethics*. 5th ed.: Oxford University Press, 2001.
4. **Charles C, Gafni A, Whelan T.** Shared decision-making in the medical encounter: what does it mean? (or it takes at least two to tango). *Soc Sci Med* 1997;44-5:681-92.
5. **Lurie JD, Weinstein JN.** Shared decision-making and the orthopaedic workforce. *Clin Orthop Relat Res* 2001-385:68-75.
6. **Clark JP, Hudak PL, Hawker GA, Coyte PC, Mahomed NN, Kreder HJ, Wright JG.** The moving target: a qualitative study of elderly patients' decision-making regarding total joint replacement surgery. *J Bone Joint Surg Am* 2004;86-A-7:1366-74.
7. **McHugh GA, Luker KA.** Influences on individuals with osteoarthritis in deciding to undergo a hip or knee joint replacement: a qualitative study. *Disabil Rehabil* 2009;31-15:1257-66.
8. **Courville XF, Hecht PJ, Tosteson AN.** Is total ankle arthroplasty a cost-effective alternative to ankle fusion? *Clin Orthop Relat Res* 2011;469-6:1721-7.
9. **Haddad SL, Coetzee JC, Estok R, Fahrback K, Banel D, Nalysnyk L.** Intermediate and long-term outcomes of total ankle arthroplasty and ankle arthrodesis. A systematic review of the literature. *J Bone Joint Surg Am* 2007;89-9:1899-905.
10. **Saltzman CL, Zimmerman MB, O'Rourke M, Brown TD, Buckwalter JA, Johnston R.** Impact of comorbidities on the measurement of health in patients with ankle osteoarthritis. *J Bone Joint Surg Am.* 2006;88-11:2366-72.

- 1  
2  
3 **11. Glazebrook M, Daniels T, Younger A, Foote CJ, Penner M, Wing K, Lau J, Leighton R, Dunbar M.** Comparison of health-related quality of life between patients with end-stage ankle and  
4 hip arthrosis. *J Bone Joint Surg Am* 2008;90-3:499-505.  
5  
6 **12. Goldberg AJ, Macgregor A, Dawson J, Singh D, Cullen N, Sharp RJ, Cooke PH.** The demand  
7 incidence of symptomatic ankle osteoarthritis presenting to foot & ankle surgeons in the United  
8 Kingdom. *Foot* 2012;22-3:163-6.  
9 **13. Guest G, MacQueen KM, Namey EE.** *Applied Thematic Analysis*. Los Angeles: Sage, 2012.  
10 **14. Braun V, Clarke V.** Using thematic analysis in psychology. *Qualitative research in Psychology*  
11 2006;3:77-101.  
12 **15. Lincoln Y, Guba E.** *Naturalistic Inquiry*. Newbury Park, CA: Sage Publications, 1985.  
13 **16. Harrington KD.** Degenerative arthritis of the ankle secondary to long-standing lateral ligament  
14 instability. *J Bone Joint Surg Am*. 1979;61-3:354-61.  
15 **17. Valderrabano V, Horisberger M, Russell I, Dougall H, Hintermann B.** Etiology of ankle  
16 osteoarthritis. *Clin Orthop Relat Res* 2009;467-7:1800-6.  
17 **18. Slobogean GP, Younger A, Apostle KL, Marra CA, Wing K, Penner M, Daniels T, Glazebrook M.** Preference-based quality of life of end-stage ankle arthritis treated with arthroplasty  
18 or arthrodesis. *Foot Ankle Int* 2010;31-7:563-6.  
19 **19. Zaidi R, Cro S, Gurusamy K, Siva N, Macgregor A, Henricson A, Goldberg A.** Outcomes of  
20 Primary Modern Total Ankle Replacements – A Systematic Review and Meta-Analysis  
21  
22 UCL Institute of Orthopaedics and Musculoskeletal Science, 2013.  
23 **20. Hintermann B, Barg A, Knupp M, Valderrabano V.** Conversion of painful ankle arthrodesis to  
24 total ankle arthroplasty. *Journal of Bone & Joint Surgery - American Volume*;91-4:850-8.  
25 **21. Greisberg J, Assal M, Flueckiger G, Hansen ST, Jr.** Takedown of ankle fusion and conversion  
26 to total ankle replacement. *Clin.Orthop.Relat Res*. 2004-424:80-8.  
27 **22.** Listed NA. <http://www.hesonline.nhs.uk> (accessed).  
28 **23. Morton RL, Tong A, Howard K, Snelling P, Webster AC.** The views of patients and carers in  
29 treatment decision making for chronic kidney disease: systematic review and thematic synthesis of  
30 qualitative studies. *BMJ* 2010;340:c112.  
31 **24. O'Neill T, Jinks C, Ong BN.** Decision-making regarding total knee replacement surgery: a  
32 qualitative meta-synthesis. *BMC Health Serv Res* 2007;7:52.  
33 **25. Davies E, Yeoh KW.** Internet chemotherapy information: impact on patients and health  
34 professionals. *Br J Cancer* 2012;106-4:651-7.  
35 **26. Xie B.** Older adults' health information wants in the internet age: implications for patient-provider  
36 relationships. *J Health Commun* 2009;14-6:510-24.  
37 **27. Stacey D, Bennett CL, Barry MJ, Col NF, Eden KB, Holmes-Rovner M, Llewellyn-Thomas H, Lyddiatt A, Légaré F, Thomson R.** Decision aids for people facing health treatment or screening  
38 decisions. *Cochrane Database Syst Rev* 2011-10:CD001431.  
39 **28. Hudak PL, Clark SJ, Raymond G.** The Omni-Relevance of Surgery: How Medical  
40 Specialization Shapes Orthopedic Surgeons' Treatment Recommendations. *Health Commun* 2012.  
41 **29. Hudak PL, Clark SJ, Raymond G.** How surgeons design treatment recommendations in  
42 orthopaedic surgery. *Soc Sci Med* 2011;73-7:1028-36.  
43 **30. Rapley T.** Distributed decision making: the anatomy of decisions-in-action. *Social Health Illn*  
44 2008;30-3:429-44.  
45 **31. Smith R.** All changed, changed utterly. British medicine will be transformed by the Bristol case.  
46 *BMJ* 1998;316-7149:1917-8.  
47 **32.** Listed NA. [http://www.gmc-uk.org/guidance/good\\_medical\\_practice/duties\\_of\\_a\\_doctor.asp](http://www.gmc-uk.org/guidance/good_medical_practice/duties_of_a_doctor.asp)  
48 (accessed).  
49 **33. Listed NA.** Revalidation: what you need to do. General Medical Council, 2012.  
50 **34. Listed NA.** Public and Patient Guide to the NJR Annual Report 2012.  
51 <http://www.njrcentre.org.uk>, 2012.  
52 **35. Hill M.** <http://www.bbc.co.uk/news/health-20584897> (accessed).  
53 **36. Impicciatore P, Pandolfini C, Casella N, Bonati M.** Reliability of health information for the  
54 public on the World Wide Web: systematic survey of advice on managing fever in children at home.  
55 *BMJ* 1997;314-7098:1875-9.  
56  
57  
58  
59  
60

- 1  
2  
3 **37. Smith JT, Pate OL, Guss D, Lee JT, Chiodo CP, Bluman EM.** Internet information quality for  
4 ten common foot and ankle diagnoses. *Foot Ankle Surg* 2012;18-3:198-202.  
5 **38. Preece J.** Emphatic communities: balancing emotional and factual communication. *Interacting*  
6 *with Computers* 1999;12-1:63-77.  
7 **39. van Uden-Kraan CF, Drossaert CH, Taal E, Seydel ER, van de Laar MA.** Participation in  
8 online patient support groups endorses patients' empowerment. *Patient Educ Couns* 2009;74-1:61-9.  
9 **40. McKinlay J.** Social Networks, Lay Consultation and Help-Seeking Behavior. *Social Forces*  
10 1973;51-3:275-92.  
11 **41. Goldberg AJ, Sharp RJ, Cooke P.** Ankle replacement: current practice of foot & ankle surgeons  
12 in the United kingdom. *Foot Ankle Int* 2009;30-10:950-4.  
13  
14  
15  
16  
17  
18  
19  
20  
21  
22  
23  
24  
25  
26  
27  
28  
29  
30  
31  
32  
33  
34  
35  
36  
37  
38  
39  
40  
41  
42  
43  
44  
45  
46  
47  
48  
49  
50  
51  
52  
53  
54  
55  
56  
57  
58  
59  
60

For peer review only

## Consolidated criteria for reporting qualitative studies (COREQ): 32-item checklist

Developed from:

Tong A, Sainsbury P, Craig J. Consolidated criteria for reporting qualitative research (COREQ): a 32-item checklist for interviews and focus groups. *International Journal for Quality in Health Care*. 2007. Volume 19, Number 6: pp. 349 – 357

**YOU MUST PROVIDE A RESPONSE FOR ALL ITEMS. ENTER N/A IF NOT APPLICABLE**

| No. Item                                       | Guide questions/description                                                                                                                              | Reported on Page # |
|------------------------------------------------|----------------------------------------------------------------------------------------------------------------------------------------------------------|--------------------|
| <b>Domain 1: Research team and reflexivity</b> |                                                                                                                                                          |                    |
| <i>Personal Characteristics</i>                |                                                                                                                                                          |                    |
| 1. Interviewer/facilitator                     | Which author/s conducted the interview or focus group?                                                                                                   | 7                  |
| 2. Credentials                                 | What were the researcher's credentials?<br>E.g. PhD, MD                                                                                                  | 1                  |
| 3. Occupation                                  | What was their occupation at the time of the study?                                                                                                      | 1                  |
| 4. Gender                                      | Was the researcher male or female?                                                                                                                       | 1                  |
| 5. Experience and training                     | What experience or training did the researcher have?                                                                                                     | n/a                |
| <i>Relationship with participants</i>          |                                                                                                                                                          |                    |
| 6. Relationship established                    | Was a relationship established prior to study commencement?                                                                                              | 7                  |
| 7. Participant knowledge of the interviewer    | What did the participants know about the researcher? e.g. personal goals, reasons for doing the research                                                 | 7                  |
| 8. Interviewer characteristics                 | What characteristics were reported about the interviewer/facilitator? e.g. Bias, assumptions, reasons and interests in the research topic                | 1 and 7            |
| <b>Domain 2: study design</b>                  |                                                                                                                                                          |                    |
| <i>Theoretical framework</i>                   |                                                                                                                                                          |                    |
| 9. Methodological orientation and Theory       | What methodological orientation was stated to underpin the study? e.g. grounded theory, discourse analysis, ethnography, phenomenology, content analysis | 6                  |
| <i>Participant selection</i>                   |                                                                                                                                                          |                    |
| 10. Sampling                                   | How were participants selected? e.g. purposive, convenience, consecutive, snowball                                                                       | 6                  |
| 11. Method of approach                         | How were participants approached? e.g. face-to-face, telephone, mail, email                                                                              | 6                  |
| 12. Sample size                                | How many participants were in the study?                                                                                                                 | 8                  |



|                                        |                                                                                                                                 |                    |
|----------------------------------------|---------------------------------------------------------------------------------------------------------------------------------|--------------------|
| 13. Non-participation                  | How many people refused to participate or dropped out? Reasons?                                                                 | 7, none            |
| <i>Setting</i>                         |                                                                                                                                 |                    |
| 14. Setting of data collection         | Where was the data collected? e.g. home, clinic, workplace                                                                      | 7                  |
| 15. Presence of non-participants       | Was anyone else present besides the participants and researchers?                                                               | n/a                |
| 16. Description of sample              | What are the important characteristics of the sample? e.g. demographic data, date                                               | 8                  |
| <i>Data collection</i>                 |                                                                                                                                 |                    |
| 17. Interview guide                    | Were questions, prompts, guides provided by the authors? Was it pilot tested?                                                   | 17                 |
| 18. Repeat interviews                  | Were repeat inter views carried out? If yes, how many?                                                                          | n/a                |
| 19. Audio/visual recording             | Did the research use audio or visual recording to collect the data?                                                             | 8 -audio           |
| 20. Field notes                        | Were field notes made during and/or after the inter view or focus group?                                                        | n/a                |
| 21. Duration                           | What was the duration of the inter views or focus group?                                                                        | 8                  |
| 22. Data saturation                    | Was data saturation discussed?                                                                                                  | 7                  |
| 23. Transcripts returned               | Were transcripts returned to participants for comment and/or correction?                                                        | no                 |
| <b>Domain 3: analysis and findings</b> |                                                                                                                                 |                    |
| <i>Data analysis</i>                   |                                                                                                                                 |                    |
| 24. Number of data coders              | How many data coders coded the data?                                                                                            | 8                  |
| 25. Description of the coding tree     | Did authors provide a description of the coding tree?                                                                           | no                 |
| 26. Derivation of themes               | Were themes identified in advance or derived from the data?                                                                     | no                 |
| 27. Software                           | What software, if applicable, was used to manage the data?                                                                      | none               |
| 28. Participant checking               | Did participants provide feedback on the findings?                                                                              | no                 |
| <i>Reporting</i>                       |                                                                                                                                 |                    |
| 29. Quotations presented               | Were participant quotations presented to illustrate the themes/findings? Was each quotation identified? e.g. participant number | Please see results |
| 30. Data and findings consistent       | Was there consistency between the data presented and the findings?                                                              | See results        |
| 31. Clarity of major themes            | Were major themes clearly presented in the findings?                                                                            | Results            |
| 32. Clarity of minor themes            | Is there a description of diverse cases or discussion of minor themes?                                                          | n/a                |

Once you have completed this checklist, please save a copy and upload it as part of your submission. When requested to do so as part of the upload process, please select the file type: *Checklist*. You will NOT be able to proceed with

1  
2  
3  
4  
5  
6  
7  
8  
9  
10  
11  
12  
13  
14  
15  
16  
17  
18  
19  
20  
21  
22  
23  
24  
25  
26  
27  
28  
29  
30  
31  
32  
33  
34  
35  
36  
37  
38  
39  
40  
41  
42  
43  
44  
45  
46  
47  
48  
49  
50  
51  
52  
53  
54  
55  
56  
57  
58  
59  
60

**submission unless the checklist has been uploaded. Please DO NOT include this checklist as part of the main manuscript document. It must be uploaded as a separate file.**

For peer review only



## How do patients with end-stage ankle arthritis decide between two surgical treatments? A qualitative study

|                                 |                                                                                                                                                                                                                                                                                                                                                                   |
|---------------------------------|-------------------------------------------------------------------------------------------------------------------------------------------------------------------------------------------------------------------------------------------------------------------------------------------------------------------------------------------------------------------|
| Journal:                        | <i>BMJ Open</i>                                                                                                                                                                                                                                                                                                                                                   |
| Manuscript ID:                  | bmjopen-2013-002782.R2                                                                                                                                                                                                                                                                                                                                            |
| Article Type:                   | Research                                                                                                                                                                                                                                                                                                                                                          |
| Date Submitted by the Author:   | 11-Jun-2013                                                                                                                                                                                                                                                                                                                                                       |
| Complete List of Authors:       | Zaidi, Razi; UCL , Institute of Orthopaedics and Musculoskeletal Science<br>Pfeil, Michael; University of East Anglia, School of Nursing Sciences<br>Macgregor, Alexander; University College London, Institute of Orthopaedics and Musculoskeletal Science<br>Goldberg, Andrew; University College London, Institute of Orthopaedics and Musculoskeletal Science |
| <b>Primary Subject Heading</b>: | Qualitative research                                                                                                                                                                                                                                                                                                                                              |
| Secondary Subject Heading:      | Surgery                                                                                                                                                                                                                                                                                                                                                           |
| Keywords:                       | Foot & ankle < ORTHOPAEDIC & TRAUMA SURGERY, QUALITATIVE RESEARCH, Musculoskeletal disorders < ORTHOPAEDIC & TRAUMA SURGERY                                                                                                                                                                                                                                       |
|                                 |                                                                                                                                                                                                                                                                                                                                                                   |

SCHOLARONE™  
Manuscripts

# How do patients with end-stage ankle arthritis decide between two surgical treatments? A qualitative study

Mr Razi Zaidi<sup>1</sup> BSc MBBS MRCS

Dr Michael Pfeil<sup>2</sup> PhD MSc RN

Prof Alexander J Macgregor<sup>1</sup> MA, MD, PhD, FRCP

Mr Andy Goldberg<sup>1</sup> OBE MD FRCS(Tr&Orth)

Correspondence to Razi Zaidi, razizaidi@doctors.net.uk

---

<sup>1</sup> UCL Institute of Orthopaedics and Musculoskeletal Science (IOMS)  
Royal National Orthopaedic Hospital (RNOH),  
Brockley Hill,  
Stanmore HA7 4LP

<sup>2</sup> University of East Anglia  
Faculty of Medicine and Health Sciences  
Edith Cavell Building 2.15  
Norwich Research Park  
Norwich  
NR4 7TJ  
UK

## Copyright for authors

The Corresponding Author has the right to grant on behalf of all authors and does grant on behalf of all authors, a worldwide licence to the Publishers and its licensees in perpetuity, in all forms, formats and media (whether known now or created in the future), to i) publish, reproduce, distribute, display and store the Contribution, ii) translate the Contribution into other languages, create adaptations, reprints, include within collections and create summaries, extracts and/or, abstracts of the Contribution, iii) create any other derivative work(s) based on the Contribution, iv) to exploit all subsidiary rights in the Contribution, v) the inclusion of electronic links from the Contribution to third party material where-ever it may be located; and, vi) licence any third party to do any or all of the above.

## Conflict of Interest

We have read and understood the BMJ Group policy on declaration of interests and have no relevant interests to declare.

## Authorship

All of the four authors listed were involved in conception, design, analysis and interpretation of generated data. Additionally all were involved in drafting, revising and final approval of the version to be published.

## Abstract

**Objective** To examine how patients decide between ankle fusion and ankle replacement in end-stage ankle arthritis.

**Design** Purposive patient selection, semi-structured interviews, thematic analysis.

**Setting** Royal National Orthopaedic Hospital, Stanmore, UK.

**Participants** 14 patients diagnosed with end-stage ankle osteoarthritis.

**Results** We interviewed 6 male and 8 female with a mean age of 58 years (range 41 to 83). All had opted for surgery after failure of at least 6 months of conservative management, sequentially trading-off daily activities to limit evolving pain. To decide between two offered treatments of ankle fusion and total ankle replacement (TAR) three major sources informed the patients decision making process; their surgeon; peers; and the Internet. The treating surgeon was viewed as the most reliable and influential source of information. Information gleaned from other patients was also important but with questionable reliability, as was information from the Internet, both of which invariably required validation by the surgeon and in some cases the GP.

**Conclusions** Patients seek knowledge from a wealth of sources including the Internet, web forums, and other patients. Whilst they leverage each of these sources to guide decision making, the most important and influential factor in governing how patients decide on any particular surgical intervention is their surgeon. A high quality doctor-patient relationship, coupled with clear, balanced and complete information is essential to enable shared decision-making to become a standard model of care.

## Article Summary

### Article Focus

- Qualitative assessment of how patients with end stage osteoarthritis of the ankle decide between surgical interventions offered to them.
- Discuss the sources of information patient's use to aid their decision-making.

### Key Message

- The treating surgeon, Internet and peers are the three main influences on patient decision making.
- The surgeon appeared to be the most valued source of information.

### Strengths and limitations of this study

- The strengths include this being the first study to take a qualitative look at how patients decide between ankle fusion and ankle replacement to treat end stage ankle osteoarthritis. The limitations include sampling from a single specialist centre and the relatively small sample size although data saturation was reached.

## Introduction

The UK National Health Service (NHS) has adopted a philosophy of “*no decision about me, without me*”, moving away from a paternalistic model of decision-making towards a shared decision-making process between patient and clinician.<sup>1</sup> This ideal is the foundation of high-quality healthcare and is especially important in the context of long-term conditions and chronic illness, such as osteoarthritis.

Patient and doctor interactions are underpinned by three main decision making models,<sup>2</sup> these being paternalistic, informed and shared.

The paternalistic model assumes the doctor knows best. It is characterised by the passive compliance of the patient to the authority of the surgeon, who is the custodian of the patient’s best interest. As a result decisions may not take account of a patient’s values and preferences, as long as the patient is perceived to benefit.<sup>3</sup> This approach is less desirable in the setting of elective surgery but still has its applications in trauma and life threatening situations, where patients may present acutely with altered conscious or mental state.

At the other end of the spectrum is the informed model, where all decisions are made by the patient.

The role of the doctor is to deliver to the patient information on all relevant treatment options including their benefits and risks. Communication in this model is largely one way.<sup>2</sup>

Shared decision making (SDM) is a two way interaction where the doctor and patient share all stages of the decision making process simultaneously and reach a decision together.<sup>4</sup> This is the ideal held by the NHS and affords many advantages in the orthopaedic setting. SDM increases patient knowledge and understanding, and creates more accurate expectations. It allows for better tailoring of treatment to patient values and has been shown to result in higher satisfaction.<sup>5</sup>



1  
2  
3 Decision making has been examined in orthopaedic surgery mainly in the context of hip and knee  
4 joint replacement. The majority of the work has centred on the decision of whether to undergo surgery  
5 or not.<sup>6,7</sup> Our aim was to address a different question, namely as to how patients that have decided to  
6 undergo surgery, decide between different treatment options. The model we have used pertains to  
7 patients with end-stage ankle osteoarthritis.  
8  
9  
10  
11  
12

13  
14  
15  
16 Osteoarthritis of the ankle is a major cause of disability with an impact on quality of life similar to  
17 end-stage heart failure<sup>10</sup> and hip arthritis.<sup>11</sup> Its demand incidence in the UK has recently been  
18 estimated to be 47.7 per 100,000.<sup>12</sup> The majority of cases are secondary to trauma or other diseases  
19 such as inflammatory arthritis.<sup>12</sup> We believe that ankle osteoarthritis is a good model to study because  
20 there are two accepted surgical treatments, ankle fusion, and total ankle replacement (TAR). Both  
21 have been shown to be valid and cost effective treatments<sup>8</sup> with a degree of clinical equipoise between  
22 them.<sup>9</sup>  
23  
24  
25  
26  
27  
28  
29  
30  
31  
32  
33

## 34 **Methods and Materials**

35  
36  
37 This study took a qualitative, interview-based approach to explore and analyse how patients' with  
38 severe ankle osteoarthritis decide between two different surgical treatments, ankle fusion and TAR.  
39  
40  
41  
42  
43

## 44 **Sample**

45  
46  
47 The study was based at the Royal National Orthopaedic Hospital NHS Trust, Stanmore, UK. This is a  
48 specialist hospital, which offers both ankle fusion and TAR as standard treatment options. Patients  
49 diagnosed with end-stage ankle osteoarthritis were purposively recruited prior to their outpatient visit  
50 to discuss their surgical treatment. Our inclusion criteria were patients of all ages with ankle  
51 osteoarthritis (diagnosed by clinical history and plain radiography), who had tried at least 6 months of  
52 non-operative treatment, that were suitable for either a fusion or TAR, and had opted for operative  
53  
54  
55  
56  
57  
58  
59  
60

1  
2  
3 intervention but were yet undecided between the two treatment options. The patients were given  
4  
5 verbal and written information, including a letter from the consultant explaining the two treatment  
6  
7 options in their case. Skeletal models and pictures were used during the consultation to support verbal  
8  
9 information conveyed, and all patients were provided with a written departmental information leaflet  
10  
11 on treatment options for ankle osteoarthritis as a further adjunct to decision making. Interviews took  
12  
13 place prior to the second appointment, which served as a platform for the patient to declare their  
14  
15 treatment choice. We excluded patients who were only suitable for one of the interventions, or had  
16  
17 declined surgery. Patients were approached directly (by RZ and AG) in clinic and the purpose of the  
18  
19 study was explained to each patient. Following a 'cooling-down' period of 72 hours, patients were  
20  
21 asked if they remained happy to participate in the study. Recruitment continued until data saturation  
22  
23 became noticeable during the last three interviews.  
24  
25  
26  
27

### 28 *Data collection and analysis*

29  
30  
31 Following informed consent all participants underwent face-to-face, semi-structured interviews  
32  
33 (n=14). The interviews were conducted by one of the authors (RZ) in the outpatient department. An  
34  
35 interview guide was used. It consisted of open-ended questions that were based on the research  
36  
37 objective and existing literature (Table 1). The schedule focused on the patients' experience of the  
38  
39 condition, the information sources they had used, the treatment options open to them, and their  
40  
41 preferences. The interviews lasted between 45 and 60 minutes; they were audio-recorded and  
42  
43 transcribed verbatim.  
44  
45  
46  
47

48  
49 The data was analysed inductively (by RZ and MP) using thematic analysis.<sup>13</sup> This is a highly flexible  
50  
51 method capable of producing a detailed and systematic account of the issues and opinions contained  
52  
53 within in the data.<sup>14</sup> The first analytical step involved repeatedly reading the interview transcripts and  
54  
55 becoming familiar with the content. This allowed initial patterns and codes to emerge from the text.  
56  
57 During the subsequent line-by-line analysis, these codes were refined and grouped into themes. Each  
58  
59  
60

1  
2  
3 theme was described in rich detail and interpreted. Themes were eventually interlinked within a  
4 comprehensive categorisation system. Finally, in order to validate our results peer-debriefing was  
5 employed.<sup>15</sup> This process required the remaining authors (AG, AM) to scrutinise the data to justify the  
6 findings.  
7  
8  
9

### 10 11 12 13 **Ethical issues**

14  
15  
16  
17 This work was approved locally through the R&D Institutional Review Board at the Royal National  
18 Orthopaedic Hospital NHS Trust, who confirmed that as these interviews were carried out as part of a  
19 wider service evaluation no formal ethical approval was required. Nevertheless, ethical procedures  
20 were strictly adhered to including the provision of full written participant information enabling  
21 informed consent and by assuring that strict participant confidentiality was maintained, for example  
22 by allocating numeric codes to all participant contributions. All participants were aware that they  
23 could stop taking part at any time.  
24  
25  
26  
27  
28  
29  
30  
31  
32  
33  
34

### 35 **Results**

36  
37 A total of 14 patients (6 male and 8 female), each with a diagnosis of ankle osteoarthritis were  
38 purposively recruited. All participants had suffered with ankle arthritis for between 10-40 years and  
39 all had tried at least 6 months of non-operative measures prior to being referred. All patients had  
40 developed a good understanding of their condition and current state over many years using a wide  
41 variety of information sources.  
42  
43  
44  
45  
46  
47

48 *"I have osteoarthritis in the ankle possibly due to a fracture of the tibia and fibula I had many*  
49 *years ago. This had led to the wearing away of cartilage in the joint, which creates*  
50 *pain."* (Patient 6)  
51  
52  
53  
54

55 Indeed the commonest cause of osteoarthritis of the ankle is following trauma such as severe sprains<sup>16</sup>  
56 or fractures of the ankle.<sup>17</sup> We have divided our findings into three broad themes:  
57  
58  
59  
60

### *Theme 1: Why patients opt for surgery*

All patients in our sample had unsuccessfully tried non-operative treatment. Persistent pain and failure of non-operative measures were the dominant reason for surgery, frequently described as “horrendous” (Patient 2) or “unbearable” (Patient 1). All patients described a sequential process of activity reduction as a result of worsening pain.

*“You live with the pain and restrict your lifestyle to cope with it, until you can’t cope. So I now need an operation.” (Patient 1)*

This trade-off process eventually concluded with one of two events that preceded the decision to undergo surgery. The first arose when the participants had become so restricted by the pain that they were unable to function or work and had no further activities to trade-off, and the second when they were forced to give up a specific activity that was very important to them. One participant was particularly keen to return to dancing and asserted that this was her main impetus for surgical intervention. Overall recreational activities were an important theme and participants anticipated some return to them post-surgery.

*“Squash, golf, I can’t do any of them now; the only activity I can do is swimming. I have put a lot of weight on as a result of not being able to do what I used to; I just hope to get back to doing something.” (Patient 9)*

In some cases, the worry of spreading pain was an impetus to proceed with surgery.

*“It’s affecting my other joints, my knee and my back, so I just want to get the ankle sorted to take the pressure off the rest.” (Patient 11)*

Several patients felt that other joints were painful as a result of their ankle and this appeared to contribute to their decision to proceed with surgery in a hope they could prevent or ease these symptoms.

1  
2  
3 The ability to work was a key factor that not only induced a perceived need for surgical intervention  
4 but could also result in patients delaying the timing of surgery. In these cases loss of earnings during  
5 the post-operative rest period was the reason for putting off surgery. This represents a ‘worker’s  
6 paradox’ since surgery is required to continue in employment, but the temporary loss of earnings  
7 during the recovery period is seen as being prohibitive.  
8  
9  
10  
11  
12

## 13 14 15 16 **Theme 2: Information sources for decision making** 17

18  
19 Three major source of information emerged from our study; healthcare professionals; peer influence;  
20 and the Internet.  
21

22  
23  
24 *“Speaking to the consultant and team has had the most impact on my decision*  
25 *making.”(Patient 7)*  
26

27  
28 Our Unit has a multidisciplinary approach, and during the patient journey they will interact with not  
29 just surgeons but also physician’s assistants, clinical nurse specialists, orthotists and physiotherapists  
30 as well as other modalities, as required. Although a few patients (n=4) mentioned a role for other  
31 allied health professionals, every patient mentioned the importance of the surgeon as being the highest  
32 influence in deciding between the two surgical treatment options, because of its perceived reliability.  
33  
34  
35  
36  
37  
38  
39

40  
41 The role of the general practitioner differed and seemed to depend on the relationship between patient  
42 and GP.  
43

44  
45  
46 *“I go to my GP with the letter from the surgeon and find it helpful to talk through the letter*  
47 *with someone I am close to.” (Patient 13)*  
48  
49

50  
51 Where the relationship between patient and GP was strong, the GPs seemed to have a valuable role as  
52 a sounding board, but where the relationship was poor, the role of the GP seemed to be more simply  
53 that of a gate keeper.  
54  
55  
56  
57  
58  
59  
60

1  
2  
3 *"I don't ever see the same GP twice. I don't see any role for my GP other than to refer me."*

4  
5 *(Patient 14)*

6  
7 Indeed, rapport between patient and surgeon was also key. This distinction became clear in cases  
8 where patients had been referred on for second opinions.

9  
10  
11 *"I didn't have confidence in the first surgeon, so I sought a second opinion" (Patient 1)*

12  
13 Similarly the lack of treatment options by a centre would influence some patients.

14  
15  
16 *"The surgeon I initially saw only offered fusion and I didn't feel I had all the information I*  
17 *needed, so I sought a second opinion." (Patient 4)*

18  
19  
20 Peer influence was the second most significant factor that shaped decision-making.

21  
22  
23 *"I had [famous sportsman] in my cab and he told me he had an ankle fusion, with a great*  
24 *result, so I decided if it's good enough for him, then its good enough for me" (Patient 7)*

25  
26  
27 Equally, reports of substandard outcomes could result in the formation of negative perceptions.

28  
29  
30 *"I asked a friend of mine who had the operation; she said it extremely painful so that made*  
31 *me reconsider." (Patient 3)*

32  
33  
34  
35 Peer influence also has the potential to mislead when patients mistakenly compare themselves to  
36 others who have undergone a different operation. In our sample one patient undergoing ankle fusion  
37 took peer-advice from a friend who had undergone a procedure to fuse a different joint in the foot and  
38 was therefore using inappropriate information to guide their decision making.  
39  
40  
41  
42  
43  
44  
45  
46

47 The third major source of information in terms of influence was the Internet. All patients used the  
48 Internet to search for information on the procedures, and on other patient experiences.

49  
50  
51 *"You have to make sure the information you find is reliable but I was largely reading stuff*  
52 *from medical journals and websites from institutions that specialise in ankle*  
53 *replacement." (Patient 6)*

1  
2  
3 The effectiveness of the Internet to find information could at times be overwhelming and some  
4  
5 participants found it hard to limit their searches.  
6

7 *“The Internet is big and too scary because you don’t know enough, anyone can say anything”*

8  
9  
10 *(Patient 5)*

11  
12 Internet forums were often accessed and function as an extension of peer-influence. Forums allowed  
13  
14 the participants direct contact with other patients, who had undergone the same operation.  
15

16  
17 *“I went onto a forum to try and gather other people’s experiences, I found it very*  
18  
19 *useful.”(Patient 1)*

20  
21 A common theme was a difficulty in knowing how to ensure credibility of the information source.  
22  
23 The strength attributed to the surgeon’s advice was demonstrated when 10 of our 14 participants  
24  
25 asserted that it overruled other, conflicting information sources.  
26

27  
28 *“I always check any new information with my surgeon. I trust what he tells me over anyone*  
29  
30 *else, he sees this all the time and knows best.”(Patient 12)*

31  
32 Overall, the Internet was rated by patients as having the least influence on deciding what operation to  
33  
34 have, while the treating surgeon was the most influential. The influence of friends and family appears  
35  
36 to feature more in the final theme.  
37

### 38 39 40 41 42 ***Theme 3: How patients decide the best option for them***

43  
44 Patients make decisions based on their own summary of all the information available to them coupled  
45  
46 with the sounding and guidance from their immediate friends and family, as well as the practicalities  
47  
48 of their home and work situation. Patients realised that in the short term both surgical options would  
49  
50 provide them with good pain relief, which in most cases is a correct assumption.<sup>18</sup> However, one key  
51  
52 factor influencing patient choice related to the individual’s adversity to risk. Patients with an inherent  
53  
54 risk aversion found it difficult to accept anything new and selected their treatment based on the lowest  
55  
56 risk and the most predictable outcome.  
57  
58  
59  
60

1  
2  
3 *“If I had a replacement I would be looking at another operation ten years down the line. With*  
4 *a fusion I can have one operation and still have a good quality of life and get back to*  
5 *work.” (Patient 8)*  
6  
7

8  
9  
10 Indeed the cumulative annual failure rate for ankle replacements is 1.9% per year<sup>19</sup> and in patients  
11 who want certainty this was seen as a significant barrier. Some patients were willing to accept risk of  
12 further surgery providing their choice offered them greater immediate benefits.  
13

14  
15  
16 *“I think a replacement would be best for me as I want to be active, even though I understand*  
17 *that I might need further surgery at a later date.” (Patient 10)*  
18  
19

20  
21 Both risk sensitive and tolerant patients viewed ankle fusion as a “*final*” (patients 2 and 4) option,  
22 after which there were no other alternatives. Although there are surgeons that have revised fused  
23 ankles to an ankle replacement,<sup>20,21</sup> most surgeons would not recommend it, as results are poor with  
24 limited range of motion due to stiff soft tissues.  
25  
26  
27  
28  
29  
30  
31

## 32 Discussion

33  
34

35 More than 5 million elective admissions for surgery take place in the UK each year.<sup>22</sup> In most cases  
36 more than one surgical treatment is available and it is therefore crucial to better understand how  
37 patients decide between different surgical treatments. Whilst there have been previous studies  
38 exploring the factors that influence patient decision making in medical situations<sup>23</sup> and when to opt  
39 for surgery,<sup>6,24</sup> our study appears to be the first to assess not just why patients elect to undergo an  
40 intervention, but at how they decide between two orthopaedic types of surgery in the face of surgeon  
41 equipoise.  
42  
43  
44  
45  
46  
47  
48  
49  
50  
51

52 Three main sources of information emerged, of which the surgeon appeared to be the most influential,  
53 followed by peer influence, and finally the Internet. The command of the surgeon has been described  
54 previously,<sup>25,26</sup> and even information gathered from other sources, is invariably proffered to the  
55  
56  
57  
58  
59  
60



1  
2  
3 surgeon as final key validator. Although formally developed decision aids to supplement a  
4 consultation can be of great value,<sup>27</sup> no such formal decision aids are available in relation to ankle  
5 osteoarthritis. Our unit uses bespoke information leaflets to assist the patient to better understand their  
6 options, although such information leaflets are very different to decision aids, nonetheless in the  
7 absence of any formal decision aids we felt this was a useful adjunct in the information available to  
8 patients. All patients in our study had utilised our written information, although none elected to  
9 mention these as being an influencer on their decision making.  
10  
11  
12  
13  
14  
15  
16  
17  
18  
19

20 From our knowledge of the treating surgeons in our unit, we believe that the surgeons expressed no  
21 overt treatment preference, none the less, the participating patients made it clear that the surgeons'  
22 views had profound effects on their decision-making. Previous work has shown preferences can be  
23 asserted in other non-verbal ways.<sup>28,29</sup> For example the surgeons' cognizance of their patients' needs  
24 and expectations might tailor the delivery of information. This serves to establish rapport as a more  
25 patient-centred approach, but it can make the communication of a balanced view problematic.<sup>29</sup>  
26 Hudak has shown that surgeons orient to their professional identity, which in our study may be a  
27 proponent of ankle fusion or ankle replacement.<sup>28</sup> Further, Hudak showed that when surgeons talked  
28 about surgery versus no-surgery, surgery was portrayed as having a special, privileged status relative  
29 to other options; this resulted in asymmetry in the delivery of information.<sup>28</sup> The concept of subtle  
30 hierarchical delivery of information may be applicable to ankle replacement and fusion, but we would  
31 only be able to confirm this through conversational analysis, which was not within the scope of this  
32 paper, although would form a useful component of future research to contribute to better  
33 understanding how these decisions are made.  
34  
35  
36  
37  
38  
39  
40  
41  
42  
43  
44  
45  
46  
47  
48  
49  
50

51 The expression of treatment preference by the surgeon and patient are key tenets of shared decision  
52 making (SDM). In reality the complex and evolving nature of the patient-surgeon relationship results  
53 in a hybrid type consultation, for example, as knowledge is gained by the patient the process may start  
54 as SDM and evolve to become an informed type.<sup>2</sup> Decision making is distributed over time and  
55  
56  
57  
58  
59  
60

1  
2  
3 involves many sources of information (human and non-human),<sup>30</sup> a finding echoed by our patient  
4 cohort. However, despite the other sources weighing in, the surgeon continued to appear to be the  
5 final validator of any other information gleaned outside the consultation room. This idea also  
6 extended to other members of his team who were simply used additional reference points. Some of  
7 these, for example GP's, may have valuable input as was asserted by one patient in the sample. Other  
8 key individuals include allied professionals to health such as nurse specialists and physiotherapists.  
9 Our work adds further weight to the idea of decisions being "distributed" over time and people.  
10  
11  
12  
13  
14  
15  
16  
17  
18  
19

20 Our study shows that the surgeon was both a validator of information and a key influencer in the  
21 decision making process, whereas family members seem to be key influencers in the decision to  
22 undergo surgery or not. We did not find any evidence that family and friends played any role in being  
23 validators of information.  
24  
25  
26  
27  
28  
29  
30

31 Health policy in the UK has been influenced by high profile incidents such as the "The Bristol Case."  
32 This has resulted in increased scrutiny from within the profession and from outside.<sup>31</sup> As clinicians we  
33 have a duty to protect and promote the health of our patients.<sup>32</sup> The profession has acted by  
34 introducing revalidation<sup>33</sup> and in orthopaedics, the UK has been proactive in creating the world's  
35 largest National Joint Registry, recording every hip, knee, ankle and shoulder replacement implanted  
36 in England and Wales and containing in excess of 1.5m records.<sup>34</sup> In the future, surgeon-level  
37 reported outcome data is a possibility.<sup>35</sup> Aside from publicly available information, public scrutiny  
38 often manifests in patients seeking second opinions<sup>6</sup> as took place with several patients interviewed in  
39 this study. The Internet is also fast becoming a key driver of healthcare<sup>36</sup> and although this is well  
40 described in young populations,<sup>25</sup> we identified that it also affects patients in their eighties.  
41  
42  
43  
44  
45  
46  
47  
48  
49  
50  
51  
52 Importantly, however, this study also identifies that patients are aware of the limitations and risks  
53 associated with information from the Internet, a finding which is in line with other groups,<sup>25,26,37</sup> and  
54 invariably turn to their surgeon for validation. Peer-influence, for example by other patients remains  
55 important, but the divide between peer-influence and the Internet is blurring with the use of web  
56  
57  
58  
59  
60

1  
2  
3 forums<sup>38</sup> where accounts of patients who have undergone surgery seem highly persuasive and  
4  
5 empowering,<sup>39</sup> despite the potential to deliver an unbalanced, inaccurate and hence dangerous views.  
6  
7 Peer-influence was also described by McKinley in 1973,<sup>40</sup> who also highlighted concerns as different  
8  
9 “*lay consultants*” perceive problems differently and consequently, give differing advice, and that the  
10  
11 context in which advice was given influenced its weighting.<sup>40</sup> For example, information given in a  
12  
13 hospital forum, web group or in a social gathering might have different meanings. We found the most  
14  
15 influential of peers were patients who had undergone the same procedures..

16  
17  
18  
19 In this study the sample size (n=14) was determined firstly, by purposively selecting participants who  
20  
21 each could provide exhaustive data, and secondly by continuing to interview until ‘data saturation’  
22  
23 was achieved.<sup>13</sup> This became noticeable when during the last three interviews no new themes  
24  
25 emerged, and so data collection ceased. It is therefore unlikely that a larger sample would have  
26  
27 provided a bigger picture or different result. This study raises issues that are of great importance to  
28  
29 this specific patient group. The role of the surgeon, peer-influence and the Internet might have wider  
30  
31 implications in other chronic conditions beyond ankle arthritis, but further research would be needed  
32  
33 to confirm this.  
34  
35

36  
37  
38 A further limitation of this study was that it was carried out in a single specialist centre, which could  
39  
40 be argued as not being representative of patients seen in the community or at a district general  
41  
42 hospital. None the less in this centre all patients had been appropriately counselled by surgeons who  
43  
44 have a clear understanding of both treatment options and provided, in our opinion, a complete set of  
45  
46 unbiased information to guide patient decision making. Since one third of orthopaedic foot and ankle  
47  
48 surgeons in the UK do not carry out ankle replacement,<sup>41</sup> it is possible that patients from other centres,  
49  
50 might not be offered such unbiased information, and this would undoubtedly influence their decision.  
51  
52 This was evidenced in our study by feedback from patients who had sought a second opinion because  
53  
54 they did not feel they had been provided with all of the information they needed at the initial hospital.  
55  
56  
57  
58  
59  
60

## Conclusion

Patients seek knowledge from a wealth of sources including the Internet, web forums, and other patients. Whilst they leverage all these sources, the most important and influential factor in governing how patients decide on a particular surgical intervention is their surgeon. Other groups have shown how a surgeon's personal preferences and inclinations can dominate the patient's decision, and therefore clear and balanced, evidence-based information is crucial to allow patients to make an informed choice. Good communication by the surgeon assists in the development of a high quality doctor-patient relationship and will enable shared decision-making to become a reality.

## Tables

|   | Question                                                                                             | Focus                          |
|---|------------------------------------------------------------------------------------------------------|--------------------------------|
| 1 | Could you please explain your ankle problem to me.                                                   | Knowledge of ankle arthritis   |
| 2 | How did you find information about your ankle condition?                                             | Acquiring information          |
| 3 | Where did the information come from?                                                                 |                                |
| 4 | How did you find that information?                                                                   |                                |
| 5 | What did you find out about it?                                                                      | Knowledge of ankle arthritis   |
| 6 | What can you tell me about the treatment options you have?                                           | Knowledge of treatment options |
| 7 | How did you find out about these treatment options?                                                  | Acquiring information          |
| 8 | What do you think about the treatment options you have? What are their advantages and disadvantages? | Personal treatment preferences |

Table 1

## References

- 1. No Authors Listed.** Liberating the NHS: No decision about me, without me. Department of Health, 2012.
- 2. Charles C, Whelan T, Gafni A.** What do we mean by partnership in making decisions about treatment? *BMJ* 1999;319-7212:780-782.
- 3. Beauchamp T, Childress J.** *Principles of biomedical ethics*. 5th ed.: Oxford University Press, 2001.
- 4. Charles C, Gafni A, Whelan T.** Shared decision-making in the medical encounter: what does it mean? (or it takes at least two to tango). *Soc Sci Med* 1997;44-5:681-692.
- 5. Lurie JD, Weinstein JN.** Shared decision-making and the orthopaedic workforce. *Clin Orthop Relat Res* 2001-385:68-75.
- 6. Clark JP, Hudak PL, Hawker GA, Coyte PC, Mahomed NN, Kreder HJ, Wright JG.** The moving target: a qualitative study of elderly patients' decision-making regarding total joint replacement surgery. *J Bone Joint Surg Am* 2004;86-A-7:1366-1374.
- 7. McHugh GA, Luker KA.** Influences on individuals with osteoarthritis in deciding to undergo a hip or knee joint replacement: a qualitative study. *Disabil Rehabil* 2009;31-15:1257-1266.
- 8. Courville XF, Hecht PJ, Tosteson AN.** Is total ankle arthroplasty a cost-effective alternative to ankle fusion? *Clin Orthop Relat Res* 2011;469-6:1721-1727.
- 9. Haddad SL, Coetzee JC, Estok R, Fahrback K, Banel D, Nalysnyk L.** Intermediate and long-term outcomes of total ankle arthroplasty and ankle arthrodesis. A systematic review of the literature. *J Bone Joint Surg Am* 2007;89-9:1899-1905.
- 10. Saltzman CL, Zimmerman MB, O'Rourke M, Brown TD, Buckwalter JA, Johnston R.** Impact of comorbidities on the measurement of health in patients with ankle osteoarthritis. *J Bone Joint Surg Am*. 2006;88-11:2366-2372.
- 11. Glazebrook M, Daniels T, Younger A, Foote CJ, Penner M, Wing K, Lau J, Leighton R, Dunbar M.** Comparison of health-related quality of life between patients with end-stage ankle and hip arthrosis. *J Bone Joint Surg Am* 2008;90-3:499-505.

- 1  
2  
3 **12. Goldberg AJ, Macgregor A, Dawson J, Singh D, Cullen N, Sharp RJ, Cooke PH.** The demand  
4 incidence of symptomatic ankle osteoarthritis presenting to foot & ankle surgeons in the United  
5 Kingdom. *Foot* 2012;22-3:163-166.
- 6 **13. Guest G, MacQueen KM, Namey EE.** *Applied Thematic Analysis*. Los Angeles: Sage, 2012.
- 7 **14. Braun V, Clarke V.** Using thematic analysis in psychology. *Qualitative research in Psychology*  
8 2006;3:77-101.
- 9 **15. Lincoln Y, Guba E.** *Naturalistic Inquiry*. Newbury Park, CA: Sage Publications, 1985.
- 10 **16. Harrington KD.** Degenerative arthritis of the ankle secondary to long-standing lateral ligament  
11 instability. *J Bone Joint Surg Am.* 1979;61-3:354-361.
- 12 **17. Valderrabano V, Horisberger M, Russell I, Dougall H, Hintermann B.** Etiology of ankle  
13 osteoarthritis. *Clin Orthop Relat Res* 2009;467-7:1800-1806.
- 14 **18. Slobogean GP, Younger A, Apostle KL, Marra CA, Wing K, Penner M, Daniels T,**  
15 **Glazebrook M.** Preference-based quality of life of end-stage ankle arthritis treated with arthroplasty  
16 or arthrodesis. *Foot Ankle Int* 2010;31-7:563-566.
- 17 **19. Zaidi R, Cro S, Gurusamy K, Siva N, Macgregor A, Henricson A, Goldberg A.** Outcomes of  
18 Primary Modern Total Ankle Replacements – A Systematic Review and Meta-Analysis. 2013  
19
- 20 **20. Hintermann B, Barg A, Knupp M, Valderrabano V.** Conversion of painful ankle arthrodesis to  
21 total ankle arthroplasty. *Journal of Bone & Joint Surgery - American Volume*;91-4:850-858.
- 22 **21. Greisberg J, Assal M, Flueckiger G, Hansen ST, Jr.** Takedown of ankle fusion and conversion  
23 to total ankle replacement. *Clin.Orthop.Relat Res.* 2004-424:80-88.
- 24 **22. No Authors Listed.** <http://www.hesonline.nhs.uk> (accessed Jan 2013).
- 25 **23. Morton RL, Tong A, Howard K, Snelling P, Webster AC.** The views of patients and carers in  
26 treatment decision making for chronic kidney disease: systematic review and thematic synthesis of  
27 qualitative studies. *BMJ* 2010;340:c112.
- 28 **24. O'Neill T, Jinks C, Ong BN.** Decision-making regarding total knee replacement surgery: a  
29 qualitative meta-synthesis. *BMC Health Serv Res* 2007;7:52.
- 30 **25. Davies E, Yeoh KW.** Internet chemotherapy information: impact on patients and health  
31 professionals. *Br J Cancer* 2012;106-4:651-657.
- 32 **26. Xie B.** Older adults' health information wants in the internet age: implications for patient-provider  
33 relationships. *J Health Commun* 2009;14-6:510-524.
- 34 **27. Stacey D, Bennett CL, Barry MJ, Col NF, Eden KB, Holmes-Rovner M, Llewellyn-Thomas**  
35 **H, Lyddiatt A, Légaré F, Thomson R.** Decision aids for people facing health treatment or screening  
36 decisions. *Cochrane Database Syst Rev* 2011-10:CD001431.
- 37 **28. Hudak PL, Clark SJ, Raymond G.** The Omni-Relevance of Surgery: How Medical  
38 Specialization Shapes Orthopedic Surgeons' Treatment Recommendations. *Health Commun* 2012.
- 39 **29. Hudak PL, Clark SJ, Raymond G.** How surgeons design treatment recommendations in  
40 orthopaedic surgery. *Soc Sci Med* 2011;73-7:1028-36.
- 41 **30. Rapley T.** Distributed decision making: the anatomy of decisions-in-action. *Sociol Health Illn*  
42 2008;30-3:429-44.
- 43 **31. Smith R.** All changed, changed utterly. British medicine will be transformed by the Bristol case.  
44 *BMJ* 1998;316-7149:1917-8.
- 45 **32. No Authors Listed.** [http://www.gmc-](http://www.gmc-uk.org/guidance/good_medical_practice/duties_of_a_doctor.asp)  
46 [uk.org/guidance/good\\_medical\\_practice/duties\\_of\\_a\\_doctor.asp](http://www.gmc-uk.org/guidance/good_medical_practice/duties_of_a_doctor.asp) (accessed Jan 2013).
- 47 **33. No Authors Listed.** Revalidation: what you need to do. General Medical Council, 2012.
- 48 **34. No Authors Listed.** Public and Patient Guide to the NJR Annual Report 2012.  
49 <http://www.njrcentre.org.uk>, 2012.
- 50 **35. Hill M.** <http://www.bbc.co.uk/news/health-20584897> (accessed Jan 2013).
- 51 **36. Impicciatore P, Pandolfini C, Casella N, Bonati M.** Reliability of health information for the  
52 public on the World Wide Web: systematic survey of advice on managing fever in children at home.  
53 *BMJ* 1997;314-7098:1875-1879.
- 54 **37. Smith JT, Pate OL, Guss D, Lee JT, Chiodo CP, Bluman EM.** Internet information quality for  
55 ten common foot and ankle diagnoses. *Foot Ankle Surg* 2012;18-3:198-202.
- 56 **38. Preece J.** Emphatic communities: balancing emotional and factual communication. *Interacting*  
57 *with Computers* 1999;12-1:63-77.  
58  
59  
60

1  
2  
3 **39. van Uden-Kraan CF, Drossaert CH, Taal E, Seydel ER, van de Laar MA.** Participation in  
4 online patient support groups endorses patients' empowerment. *Patient Educ Couns* 2009;74-1:61-9.

5 **40. McKinlay J.** Social Networks, Lay Consultation and Help-Seeking Behavior. *Social Forces*  
6 1973;51-3:275-292.

7 **41. Goldberg AJ, Sharp RJ, Cooke P.** Ankle replacement: current practice of foot & ankle surgeons  
8 in the United kingdom. *Foot Ankle Int* 2009;30-10:950-954.  
9

10  
11  
12  
13  
14  
15  
16  
17  
18  
19  
20  
21  
22  
23  
24  
25  
26  
27  
28  
29  
30  
31  
32  
33  
34  
35  
36  
37  
38  
39  
40  
41  
42  
43  
44  
45  
46  
47  
48  
49  
50  
51  
52  
53  
54  
55  
56  
57  
58  
59  
60

For peer review only

# How do patients with end-stage ankle arthritis decide between two surgical treatments? A qualitative study

Mr Razi Zaidi<sup>1</sup> BSc MBBS MRCS

Dr Michael Pfeil<sup>2</sup> PhD MSc RN

Prof Alexander J Macgregor<sup>1</sup> MA, MD, PhD, FRCP

Mr Andy Goldberg<sup>1</sup> OBE MD FRCS(Tr&Orth)

Correspondence to Razi Zaidi, razizaidi@doctors.net.uk

---

<sup>1</sup> UCL Institute of Orthopaedics and Musculoskeletal Science (IOMS)  
Royal National Orthopaedic Hospital (RNOH),  
Brockley Hill,  
Stanmore HA7 4LP

<sup>2</sup> University of East Anglia  
Faculty of Medicine and Health Sciences  
Edith Cavell Building 2.15  
Norwich Research Park  
Norwich  
NR4 7TJ  
UK



## Copyright for authors

The Corresponding Author has the right to grant on behalf of all authors and does grant on behalf of all authors, a worldwide licence to the Publishers and its licensees in perpetuity, in all forms, formats and media (whether known now or created in the future), to i) publish, reproduce, distribute, display and store the Contribution, ii) translate the Contribution into other languages, create adaptations, reprints, include within collections and create summaries, extracts and/or, abstracts of the Contribution, iii) create any other derivative work(s) based on the Contribution, iv) to exploit all subsidiary rights in the Contribution, v) the inclusion of electronic links from the Contribution to third party material where-ever it may be located; and, vi) licence any third party to do any or all of the above.

## Conflict of Interest

We have read and understood the BMJ Group policy on declaration of interests and have no relevant interests to declare.

## Authorship

All of the four authors listed were involved in conception, design, analysis and interpretation of generated data. Additionally all were involved in drafting, revising and final approval of the version to be published.

## Abstract

**Objective** To examine how patients decide between ankle fusion and ankle replacement in end-stage ankle arthritis.

**Design** Purposive patient selection, semi-structured interviews, thematic analysis.

**Setting** Royal National Orthopaedic Hospital, Stanmore, UK.

**Participants** 14 patients diagnosed with end-stage ankle osteoarthritis.

**Results** We interviewed 6 male and 8 female with a mean age of 58 years (range 41 to 83). All had opted for surgery after failure of at least 6 months of conservative management, sequentially trading-off daily activities to limit evolving pain. To decide between two offered treatments of ankle fusion and total ankle replacement (TAR) three major sources informed the patients decision making process; their surgeon; peers; and the Internet. The treating surgeon was viewed as the most reliable and influential source of information. Information gleaned from other patients was also important but with questionable reliability, as was information from the Internet, both of which invariably required validation by the surgeon and in some cases the GP.

**Conclusions** Patients seek knowledge from a wealth of sources including the Internet, web forums, and other patients. Whilst they leverage each of these sources to guide decision making, the most important and influential factor in governing how patients decide on any particular surgical intervention is their surgeon. A high quality doctor-patient relationship, coupled with clear, balanced and complete information is essential to enable shared decision-making to become a standard model of care.

## Article Summary

### Article Focus

- Qualitative assessment of how patients with end stage osteoarthritis of the ankle decide between surgical interventions offered to them.
- Discuss the sources of information patient's use to aid their decision-making.

### Key Message

- The treating surgeon, Internet and peers are the three main influences on patient decision making.
- The surgeon appeared to be the most valued source of information.

### Strengths and limitations of this study

- The strengths include this being the first study to take a qualitative look at how patients decide between ankle fusion and ankle replacement to treat end stage ankle osteoarthritis. The limitations include sampling from a single specialist centre and the relatively small sample size although data saturation was reached.

## Introduction

The UK National Health Service (NHS) has adopted a philosophy of “*no decision about me, without me*”, moving away from a paternalistic model of decision-making towards a shared decision-making process between patient and clinician.<sup>1</sup> This ideal is the foundation of high-quality healthcare and is especially important in the context of long-term conditions and chronic illness, such as osteoarthritis.

Patient and doctor interactions are underpinned by three main decision making models,<sup>2</sup> these being paternalistic, informed and shared.

The paternalistic model assumes the doctor knows best. It is characterised by the passive compliance of the patient to the authority of the surgeon, who is the custodian of the patient’s best interest. As a result **decisions may not take account of a patient’s values and preferences**, as long as the patient is perceived to benefit.<sup>3</sup> This approach is less desirable in the setting of elective surgery but still has its applications in trauma and life threatening situations, where patients may present acutely with altered conscious or mental state.

At the other end of the spectrum is the informed model, where all decisions are made by the patient.

The role of the doctor is to deliver to the patient information on all relevant treatment options including their benefits and risks. Communication in this model is **largely one way**.<sup>2</sup>

Shared decision making (SDM) is a two way interaction where the doctor and patient share all stages of the decision making process simultaneously and reach a decision together.<sup>4</sup> This is the ideal held by the NHS and affords many advantages in the orthopaedic setting. SDM increases patient knowledge and understanding, and creates more accurate expectations. It allows for better tailoring of treatment to patient values and has been shown to result in higher satisfaction.<sup>5</sup>

1  
2  
3 Decision making has been examined in orthopaedic surgery mainly in the context of hip and knee  
4 joint replacement. The majority of the work has centred on the decision of whether to undergo surgery  
5 or not.<sup>6,7</sup> Our aim was to address a different question, namely as to how patients that have decided to  
6 undergo surgery, decide between different treatment options. The model we have used pertains to  
7 patients with end-stage ankle osteoarthritis.  
8  
9  
10  
11  
12

13  
14  
15  
16 Osteoarthritis of the ankle is a major cause of disability with an impact on quality of life similar to  
17 end-stage heart failure<sup>10</sup> and hip arthritis.<sup>11</sup> Its demand incidence in the UK has recently been  
18 estimated to be 47.7 per 100,000.<sup>12</sup> The majority of cases are secondary to trauma or other diseases  
19 such as inflammatory arthritis.<sup>12</sup> We believe that ankle osteoarthritis is a good model to study because  
20 there are two accepted surgical treatments, ankle fusion, and total ankle replacement (TAR). Both  
21 have been shown to be valid and cost effective treatments<sup>8</sup> with a degree of clinical equipoise between  
22 them.<sup>9</sup>  
23  
24  
25  
26  
27  
28  
29  
30  
31  
32  
33

## 34 **Methods and Materials**

35  
36  
37 This study took a qualitative, interview-based approach to explore and analyse how patients' with  
38 severe ankle osteoarthritis decide between two different surgical treatments, ankle fusion and TAR.  
39  
40  
41  
42  
43

## 44 **Sample**

45  
46  
47 The study was based at the Royal National Orthopaedic Hospital NHS Trust, Stanmore, UK. This is a  
48 specialist hospital, which offers both ankle fusion and TAR as standard treatment options. Patients  
49 diagnosed with end-stage ankle osteoarthritis were purposively recruited prior to their outpatient visit  
50 to discuss their surgical treatment. Our inclusion criteria were patients of all ages with ankle  
51 osteoarthritis (diagnosed by clinical history and plain radiography), who had tried at least 6 months of  
52 non-operative treatment, that were suitable for either a fusion or TAR, and had opted for operative  
53  
54  
55  
56  
57  
58  
59  
60

1  
2  
3 intervention but were yet undecided between the two treatment options. The patients were given  
4 verbal and written information, including a letter from the consultant explaining the two treatment  
5 options in their case. Skeletal models and pictures were used during the consultation to support verbal  
6 information conveyed, and **all patients were provided with a written departmental information**  
7 **leaflet on treatment options for ankle osteoarthritis as a further adjunct to decision making.**  
8  
9 Interviews took place prior to the second appointment, which served as a platform for the patient to  
10 declare their treatment choice. We excluded patients who were only suitable for one of the  
11 interventions, or had declined surgery. Patients were approached directly (by RZ and AG) in clinic  
12 and the purpose of the study was explained to each patient. Following a 'cooling-down' period of 72  
13 hours, patients were asked if they remained happy to participate in the study. Recruitment continued  
14 until data saturation became noticeable during the last three interviews.  
15  
16  
17  
18  
19  
20  
21  
22  
23  
24  
25  
26  
27

### 28 *Data collection and analysis*

29  
30  
31 Following informed consent all participants underwent face-to-face, semi-structured interviews  
32 (n=14). The interviews were conducted by one of the authors (RZ) in the outpatient department. An  
33 interview guide was used. It consisted of open-ended questions that were based on the research  
34 objective and existing literature (Table 1). The schedule focused on the patients' experience of the  
35 condition, the information sources they had used, the treatment options open to them, and their  
36 preferences. The interviews lasted between 45 and 60 minutes; they were audio-recorded and  
37 transcribed verbatim.  
38  
39  
40  
41  
42  
43  
44  
45  
46  
47

48 The data was analysed inductively (by RZ and MP) using thematic analysis.<sup>13</sup> This is a highly flexible  
49 method capable of producing a detailed and systematic account of the issues and opinions contained  
50 within in the data.<sup>14</sup> The first analytical step involved repeatedly reading the interview transcripts and  
51 becoming familiar with the content. This allowed initial patterns and codes to emerge from the text.  
52  
53 During the subsequent line-by-line analysis, these codes were refined and grouped into themes. Each  
54  
55  
56  
57  
58  
59  
60

1  
2  
3 theme was described in rich detail and interpreted. Themes were eventually interlinked within a  
4 comprehensive categorisation system. Finally, in order to validate our results peer-debriefing was  
5 employed.<sup>15</sup> This process required the remaining authors (AG, AM) to scrutinise the data to justify the  
6 findings.  
7  
8  
9

### 10 11 12 13 *Ethical issues*

14  
15  
16  
17 This work was approved locally through the R&D Institutional Review Board at the Royal National  
18 Orthopaedic Hospital NHS Trust, who confirmed that as these interviews were carried out as part of a  
19 wider service evaluation no formal ethical approval was required. Nevertheless, ethical procedures  
20 were strictly adhered to including the provision of full written participant information enabling  
21 informed consent and by assuring that strict participant **confidentiality** was maintained, for example  
22 by allocating numeric codes to all participant contributions. All participants were aware that they  
23 could stop taking part at any time.  
24  
25  
26  
27  
28  
29  
30  
31  
32  
33  
34

### 35 **Results**

36  
37 A total of 14 patients (6 male and 8 female), each with a diagnosis of ankle osteoarthritis were  
38 purposively recruited. All participants had suffered with ankle arthritis for between 10-40 years and  
39 all had tried at least 6 months of non-operative measures prior to being referred. All patients had  
40 developed a good understanding of their condition and current state over many years using a wide  
41 variety of information sources.  
42  
43  
44  
45  
46  
47

48 *"I have osteoarthritis in the ankle possibly due to a fracture of the tibia and fibula I had many*  
49 *years ago. This had led to the wearing away of cartilage in the joint, which creates*  
50 *pain."* (Patient 6)  
51  
52  
53  
54

55 Indeed the commonest cause of osteoarthritis of the ankle is following trauma such as severe sprains<sup>16</sup>  
56 or fractures of the ankle.<sup>17</sup> We have divided our findings into three broad themes:  
57  
58  
59  
60

### *Theme 1: Why patients opt for surgery*

All patients in our sample had unsuccessfully tried non-operative treatment. Persistent pain and failure of non-operative measures were the dominant reason for surgery, frequently described as “horrendous” (Patient 2) or “unbearable” (Patient 1). All patients described a sequential process of activity reduction as a result of worsening pain.

*“You live with the pain and restrict your lifestyle to cope with it, until you can’t cope. So I now need an operation.” (Patient 1)*

This trade-off process eventually concluded with one of two events that preceded the decision to undergo surgery. The first arose when the participants had become so restricted by the pain that they were unable to function or work and had no further activities to trade-off, and the second when they were forced to give up a specific activity that was very important to them. One participant was particularly keen to return to dancing and asserted that this was her main impetus for surgical intervention. Overall recreational activities were an important theme and participants anticipated some return to them post-surgery.

*“Squash, golf, I can’t do any of them now; the only activity I can do is swimming. I have put a lot of weight on as a result of not being able to do what I used to; I just hope to get back to doing something.” (Patient 9)*

In some cases, the worry of spreading pain was an impetus to proceed with surgery.

*“It’s affecting my other joints, my knee and my back, so I just want to get the ankle sorted to take the pressure off the rest.” (Patient 11)*

Several patients felt that other joints were painful as a result of their ankle and this appeared to contribute to their decision to proceed with surgery in a hope they could prevent or ease these symptoms.



1  
2  
3 The ability to work was a key factor that not only induced a perceived need for surgical intervention  
4 but could also result in patients delaying the timing of surgery. In these cases loss of earnings during  
5 the post-operative rest period was the reason for putting off surgery. This represents a ‘worker’s  
6 paradox’ since surgery is required to continue in employment, but the temporary loss of earnings  
7 during the recovery period is seen as being prohibitive.  
8  
9  
10  
11  
12

## 13 14 15 16 **Theme 2: Information sources for decision making** 17

18  
19 Three major source of information emerged from our study; healthcare professionals; peer influence;  
20 and the Internet.  
21

22  
23  
24 *“Speaking to the consultant and team has had the most impact on my decision*  
25 *making.”(Patient 7)*  
26

27  
28 **Our Unit has a multidisciplinary approach, and during the patient journey they will interact**  
29 **with not just surgeons but also physician’s assistants, clinical nurse specialists, orthotists and**  
30 **physiotherapists as well as other modalities, as required. Although a few patients (n=4)**  
31 **mentioned a role for other allied health professionals, every patient mentioned the importance**  
32 **of the surgeon as being the highest influence in deciding between the two surgical treatment**  
33 **options, because of its perceived reliability.**  
34  
35  
36  
37  
38  
39  
40  
41  
42

43 The role of the general practitioner differed and seemed to depend on the relationship between patient  
44 and GP.  
45

46  
47  
48 *“I go to my GP with the letter from the surgeon and find it helpful to talk through the letter*  
49 *with someone I am close to.” (Patient 13)*  
50  
51

52 Where the relationship between patient and GP was strong, **the GPs seemed to have a valuable role**  
53 **as a sounding board**, but where the relationship was poor, the role of the GP seemed to be more  
54 simply that of a gate keeper.  
55  
56  
57  
58  
59  
60

1  
2  
3 *"I don't ever see the same GP twice. I don't see any role for my GP other than to refer me."*

4  
5 *(Patient 14)*

6  
7 Indeed, rapport between patient and surgeon was also key. This distinction became clear in cases  
8 where patients had been referred on for second opinions.

9  
10  
11 *"I didn't have confidence in the first surgeon, so I sought a second opinion" (Patient 1)*

12  
13 Similarly the lack of treatment options by a centre would influence some patients.

14  
15  
16  
17 *"The surgeon I initially saw only offered fusion and I didn't feel I had all the information I*  
18 *needed, so I sought a second opinion." (Patient 4)*

19  
20  
21 Peer influence was the second most significant factor that shaped decision-making.

22  
23  
24 *"I had [famous sportsman] in my cab and he told me he had an ankle fusion, with a great*  
25 *result, so I decided if it's good enough for him, then its good enough for me" (Patient 7)*

26  
27  
28 Equally, reports of substandard outcomes could result in the formation of negative perceptions.

29  
30  
31 *"I asked a friend of mine who had the operation; she said it extremely painful so that made*  
32 *me reconsider." (Patient 3)*

33  
34  
35  
36 Peer influence also has the potential to mislead when patients mistakenly compare themselves to  
37 others who have undergone a different operation. In our sample one patient undergoing ankle fusion  
38 took peer-advice from a friend who had undergone a procedure to fuse a different joint in the foot **and**  
39 **was therefore using inappropriate information to guide their decision making.**

40  
41  
42  
43  
44  
45  
46  
47 The third major source of information in terms of influence was the Internet. All patients used the  
48 Internet to search for information on the procedures, and on other patient experiences.

49  
50  
51 *"You have to make sure the information you find is reliable but I was largely reading stuff*  
52 *from medical journals and websites from institutions that specialise in ankle*  
53 *replacement." (Patient 6)*

1  
2  
3 The effectiveness of the Internet to find information could at times be overwhelming and some  
4  
5 participants found it hard to limit their searches.  
6

7 *“The Internet is big and too scary because you don’t know enough, anyone can say anything”*

8  
9  
10 *(Patient 5)*

11  
12 Internet forums were often accessed and function as an extension of peer-influence. Forums allowed  
13  
14 the participants direct contact with other patients, who had undergone the same operation.  
15

16  
17 *“I went onto a forum to try and gather other people’s experiences, I found it very*  
18  
19 *useful.”(Patient 1)*

20  
21 A common theme was a difficulty in knowing how to ensure credibility of the information source.  
22

23 **The strength attributed to the surgeon’s advice was demonstrated when 10 of our 14**  
24  
25 **participants asserted that it overruled other, conflicting information sources.**  
26

27  
28 *“I always check any new information with my surgeon. I trust what he tells me over anyone*  
29  
30 *else, he sees this all the time and knows best.”(Patient 12)*

31  
32 Overall, the Internet was rated by patients as having the least influence on deciding what operation to  
33  
34 have, while the treating surgeon was the most influential. The influence of friends and family appears  
35  
36 to feature more in the final theme.  
37  
38  
39  
40  
41

### 42 ***Theme 3: How patients decide the best option for them***

43  
44 Patients make decisions based on their own summary of all the information available to them coupled  
45  
46 with the sounding and guidance from their immediate friends and family, as well as the practicalities  
47  
48 of their home and work situation. Patients realised that in the short term both surgical options would  
49  
50 provide them with good pain relief, which in most cases is a correct assumption.<sup>18</sup> However, one key  
51  
52 factor influencing patient choice related to the individual’s adversity to risk. Patients with an inherent  
53  
54 risk aversion found it difficult to accept anything new and selected their treatment based on the lowest  
55  
56 risk and the most predictable outcome.  
57  
58  
59  
60

1  
2  
3 *“If I had a replacement I would be looking at another operation ten years down the line. With*  
4 *a fusion I can have one operation and still have a good quality of life and get back to*  
5 *work.” (Patient 8)*  
6  
7

8  
9  
10 Indeed the cumulative annual failure rate for ankle replacements is 1.9% per year<sup>19</sup> and in patients  
11 who want certainty this was seen as a significant barrier. Some patients were willing to accept risk of  
12 further surgery providing their choice offered them greater immediate benefits.  
13

14  
15  
16 *“I think a replacement would be best for me as I want to be active, even though I understand*  
17 *that I might need further surgery at a later date.” (Patient 10)*  
18  
19

20 Both **risk sensitive and tolerant patients** viewed ankle fusion as a “final” (patients 2 and 4) option,  
21 after which there were no other alternatives. Although there are surgeons that have revised fused  
22 ankles to an ankle replacement,<sup>20,21</sup> most surgeons would not recommend it, as results are poor with  
23 limited range of motion due to stiff soft tissues.  
24  
25  
26  
27  
28  
29  
30  
31

## 32 Discussion

33  
34  
35 More than 5 million elective admissions for surgery take place in the UK each year.<sup>22</sup> In most cases  
36 more than one surgical treatment is available and it is therefore crucial to better understand how  
37 patients decide between different surgical treatments. Whilst there have been previous studies  
38 exploring the factors that influence patient decision making in medical situations<sup>23</sup> and when to opt  
39 for surgery,<sup>6,24</sup> our study **appears to be** the first to assess not just why patients elect to undergo an  
40 intervention, but at how they decide between two orthopaedic types of surgery in the face of surgeon  
41 equipoise.  
42  
43  
44  
45  
46  
47  
48  
49  
50  
51

52 Three main sources of information emerged, of which the surgeon appeared to be the most influential,  
53 followed by peer influence, and finally the Internet. The command of the surgeon has been described  
54 previously,<sup>25,26</sup> and even information gathered from other sources, is invariably proffered to the  
55  
56  
57  
58  
59  
60

1  
2  
3 surgeon as final key validator. Although formally developed decision aids to supplement a  
4 consultation can be of great value,<sup>27</sup> **no such formal decision aids are available in relation to ankle**  
5 **osteoarthritis. Our unit uses bespoke information leaflets to assist the patient to better**  
6 **understand their options, although such information leaflets are very different to decision aids,**  
7 **nonetheless in the absence of any formal decision aids we felt this was a useful adjunct in the**  
8 **information available to patients.** All patients in our study had utilised our written information,  
9 although none elected to mention these as being an influencer on their decision making.  
10  
11  
12  
13  
14  
15  
16  
17  
18  
19

20 **From our knowledge of the treating surgeons in our unit, we believe that the surgeons** expressed  
21 no overt treatment preference, none the less, the participating patients made it clear that the surgeons'  
22 views had profound effects on their decision-making. Previous work has shown preferences can be  
23 asserted in other non-verbal ways.<sup>28,29</sup> For example the surgeons' cognizance of their patients' needs  
24 and expectations might tailor the delivery of information. This serves to establish rapport as a more  
25 patient-centred approach, but it can make the communication of a balanced view problematic.<sup>29</sup>  
26 Hudak has shown that surgeons orient to their professional identity, which in our study may be a  
27 proponent of ankle fusion or ankle replacement.<sup>28</sup> Further, Hudak showed that when surgeons talked  
28 about surgery versus no-surgery, surgery was portrayed as having a special, privileged status relative  
29 to other options; this resulted in asymmetry in the delivery of information.<sup>28</sup> The concept of subtle  
30 hierarchical delivery of information may be applicable to ankle replacement and fusion, but we would  
31 only be able to confirm this through conversational analysis, which was not within the scope of this  
32 paper, **although would form a useful component of future research to contribute to better**  
33 **understanding how these decisions are made.**  
34  
35  
36  
37  
38  
39  
40  
41  
42  
43  
44  
45  
46  
47  
48  
49  
50

51 The expression of treatment preference by the surgeon and patient are key tenets of shared decision  
52 making (SDM). In reality the complex and evolving nature of the patient-surgeon relationship results  
53 in a hybrid type consultation, for example, as knowledge is gained by the patient the process may start  
54 as SDM and evolve to become an informed type.<sup>2</sup> Decision making is distributed over time and  
55  
56  
57  
58  
59  
60

1  
2  
3 involves many sources of information (human and non-human),<sup>30</sup> a finding echoed by our patient  
4 cohort. However, despite the other sources weighing in, the surgeon continued to appear to be the  
5 final validator of any other information gleaned outside the consultation room. This idea also  
6 extended to other members of his team who were simply used additional reference points. Some of  
7 these, for example GP's, may have valuable input as was asserted by one patient in the sample. **Other**  
8 **key individuals include allied professionals to health such as nurse specialists and**  
9 **physiotherapists.** Our work adds further weight to the idea of decisions being “distributed” over time  
10 and people.  
11  
12  
13  
14  
15  
16  
17  
18  
19  
20  
21

22 **Our study shows that the surgeon was both a validator of information and a key influencer in**  
23 **the decision making process, whereas family members seem to be key influencers in the decision**  
24 **to undergo surgery or not. We did not find any evidence that family and friends played any role**  
25 **in being validators of information.**  
26  
27  
28  
29  
30  
31  
32

33 Health policy in the UK has been influenced by high profile incidents such as the “The Bristol Case.”  
34 This has resulted in increased scrutiny from within the profession and from outside.<sup>31</sup> As clinicians we  
35 have a duty to protect and promote the health of our patients.<sup>32</sup> The profession has acted by  
36 introducing revalidation<sup>33</sup> and in orthopaedics, the UK has been proactive in creating the world's  
37 largest National Joint Registry, recording every hip, knee, ankle and shoulder replacement implanted  
38 in England and Wales and containing in excess of 1.5m records.<sup>34</sup> In the future, surgeon-level  
39 reported outcome data is a possibility.<sup>35</sup> Aside from publicly available information, public scrutiny  
40 often manifests in patients seeking second opinions<sup>6</sup> as took place with several patients interviewed in  
41 this study. The Internet is also fast becoming a key driver of healthcare<sup>36</sup> and although this is well  
42 described in young populations,<sup>25</sup> we identified that it also affects patients in their eighties.  
43  
44  
45  
46  
47  
48  
49  
50  
51  
52  
53  
54  
55  
56  
57  
58  
59  
60

Importantly, however, this study also identifies that patients are aware of the limitations and risks  
associated with information from the Internet, a finding which is in line with other groups,<sup>25,26,37</sup> and  
invariably turn to their surgeon for validation. Peer-influence, for example by other patients remains

1  
2  
3 important, but the divide between peer-influence and the Internet is blurring with the use of web  
4 forums<sup>38</sup> where accounts of patients who have undergone surgery seem highly persuasive and  
5 empowering,<sup>39</sup> despite the potential to deliver an unbalanced, inaccurate and hence dangerous views.  
6  
7 Peer-influence was also described by McKinley in 1973,<sup>40</sup> who also highlighted concerns as different  
8  
9 “*lay consultants*” perceive problems differently and consequently, give differing advice, and that the  
10  
11 context in which advice was given influenced its weighting.<sup>40</sup> For example, information given in a  
12  
13 hospital forum, web group or in a social gathering might have different meanings. We found the most  
14  
15 influential of peers were patients who had undergone the same procedures..  
16  
17  
18  
19  
20

21  
22 In this study the sample size (n=14) was determined firstly, by purposively selecting participants who  
23  
24 each could provide exhaustive data, and secondly by continuing to interview until ‘data saturation’  
25  
26 was achieved.<sup>13</sup> This became noticeable when during the last three interviews no new themes  
27  
28 emerged, and so data collection ceased. It is therefore unlikely that a larger sample would have  
29  
30 provided a bigger picture or different result. This study raises issues that are of great importance to  
31  
32 this specific patient group. The role of the surgeon, peer-influence and the Internet might have wider  
33  
34 implications in other chronic conditions beyond ankle arthritis, but further research would be needed  
35  
36 to confirm this.  
37  
38  
39  
40

41  
42 A further limitation of this study was that it was carried out in a single specialist centre, which could  
43  
44 be argued as not being representative of patients seen in the community or at a district general  
45  
46 hospital. None the less in this centre all patients had been appropriately counselled by surgeons who  
47  
48 have a clear understanding of both treatment options and provided, in our opinion, a complete set of  
49  
50 unbiased information to guide patient decision making. Since one third of orthopaedic foot and ankle  
51  
52 surgeons in the UK do not carry out ankle replacement,<sup>41</sup> it is possible that patients from other centres,  
53  
54 might not be offered such unbiased information, and this would undoubtedly influence their decision.  
55  
56 This was evidenced in our study by feedback from patients who had sought a second opinion because  
57  
58 they did not feel they had been provided with all of the information they needed at the initial hospital.  
59  
60

## Conclusion

Patients seek knowledge from a wealth of sources including the Internet, web forums, and other patients. Whilst they leverage all these sources, the most important and influential factor in governing how patients decide on a particular surgical intervention is their surgeon. Other groups have shown how a surgeon's personal preferences and inclinations can dominate the patient's decision, and therefore clear and balanced, evidence-based information is crucial to allow patients to make an informed choice. Good communication by the surgeon assists in the development of a high quality doctor-patient relationship and will enable shared decision-making to become a reality.



## Tables

|   | Question                                                                                             | Focus                          |
|---|------------------------------------------------------------------------------------------------------|--------------------------------|
| 1 | Could you please explain your ankle problem to me.                                                   | Knowledge of ankle arthritis   |
| 2 | How did you find information about your ankle condition?                                             | Acquiring information          |
| 3 | Where did the information come from?                                                                 |                                |
| 4 | How did you find that information?                                                                   |                                |
| 5 | What did you find out about it?                                                                      | Knowledge of ankle arthritis   |
| 6 | What can you tell me about the treatment options you have?                                           | Knowledge of treatment options |
| 7 | How did you find out about these treatment options?                                                  | Acquiring information          |
| 8 | What do you think about the treatment options you have? What are their advantages and disadvantages? | Personal treatment preferences |

Table 1

## References

- 1. No Authors Listed.** Liberating the NHS: No decision about me, without me. Department of Health, 2012.
- 2. Charles C, Whelan T, Gafni A.** What do we mean by partnership in making decisions about treatment? *BMJ* 1999;319-7212:780-782.
- 3. Beauchamp T, Childress J.** *Principles of biomedical ethics*. 5th ed.: Oxford University Press, 2001.
- 4. Charles C, Gafni A, Whelan T.** Shared decision-making in the medical encounter: what does it mean? (or it takes at least two to tango). *Soc Sci Med* 1997;44-5:681-692.
- 5. Lurie JD, Weinstein JN.** Shared decision-making and the orthopaedic workforce. *Clin Orthop Relat Res* 2001-385:68-75.
- 6. Clark JP, Hudak PL, Hawker GA, Coyte PC, Mahomed NN, Kreder HJ, Wright JG.** The moving target: a qualitative study of elderly patients' decision-making regarding total joint replacement surgery. *J Bone Joint Surg Am* 2004;86-A-7:1366-1374.
- 7. McHugh GA, Luker KA.** Influences on individuals with osteoarthritis in deciding to undergo a hip or knee joint replacement: a qualitative study. *Disabil Rehabil* 2009;31-15:1257-1266.
- 8. Courville XF, Hecht PJ, Tosteson AN.** Is total ankle arthroplasty a cost-effective alternative to ankle fusion? *Clin Orthop Relat Res* 2011;469-6:1721-1727.
- 9. Haddad SL, Coetzee JC, Estok R, Fahrback K, Banel D, Nalysnyk L.** Intermediate and long-term outcomes of total ankle arthroplasty and ankle arthrodesis. A systematic review of the literature. *J Bone Joint Surg Am* 2007;89-9:1899-1905.
- 10. Saltzman CL, Zimmerman MB, O'Rourke M, Brown TD, Buckwalter JA, Johnston R.** Impact of comorbidities on the measurement of health in patients with ankle osteoarthritis. *J Bone Joint Surg Am.* 2006;88-11:2366-2372.
- 11. Glazebrook M, Daniels T, Younger A, Foote CJ, Penner M, Wing K, Lau J, Leighton R, Dunbar M.** Comparison of health-related quality of life between patients with end-stage ankle and hip arthrosis. *J Bone Joint Surg Am* 2008;90-3:499-505.

- 1  
2  
3 **12. Goldberg AJ, Macgregor A, Dawson J, Singh D, Cullen N, Sharp RJ, Cooke PH.** The demand  
4 incidence of symptomatic ankle osteoarthritis presenting to foot & ankle surgeons in the United  
5 Kingdom. *Foot* 2012;22-3:163-166.
- 6 **13. Guest G, MacQueen KM, Namey EE.** *Applied Thematic Analysis*. Los Angeles: Sage, 2012.
- 7 **14. Braun V, Clarke V.** Using thematic analysis in psychology. *Qualitative research in Psychology*  
8 2006;3:77-101.
- 9 **15. Lincoln Y, Guba E.** *Naturalistic Inquiry*. Newbury Park, CA: Sage Publications, 1985.
- 10 **16. Harrington KD.** Degenerative arthritis of the ankle secondary to long-standing lateral ligament  
11 instability. *J Bone Joint Surg Am.* 1979;61-3:354-361.
- 12 **17. Valderrabano V, Horisberger M, Russell I, Dougall H, Hintermann B.** Etiology of ankle  
13 osteoarthritis. *Clin Orthop Relat Res* 2009;467-7:1800-1806.
- 14 **18. Slobogean GP, Younger A, Apostle KL, Marra CA, Wing K, Penner M, Daniels T,**  
15 **Glazebrook M.** Preference-based quality of life of end-stage ankle arthritis treated with arthroplasty  
16 or arthrodesis. *Foot Ankle Int* 2010;31-7:563-566.
- 17 **19. Zaidi R, Cro S, Gurusamy K, Siva N, Macgregor A, Henricson A, Goldberg A.** Outcomes of  
18 Primary Modern Total Ankle Replacements – A Systematic Review and Meta-Analysis. 2013  
19
- 20 **20. Hintermann B, Barg A, Knupp M, Valderrabano V.** Conversion of painful ankle arthrodesis to  
21 total ankle arthroplasty. *Journal of Bone & Joint Surgery - American Volume*;91-4:850-858.
- 22 **21. Greisberg J, Assal M, Flueckiger G, Hansen ST, Jr.** Takedown of ankle fusion and conversion  
23 to total ankle replacement. *Clin.Orthop.Relat Res.* 2004-424:80-88.
- 24 **22. No Authors Listed.** <http://www.hesonline.nhs.uk> (accessed Jan 2013).
- 25 **23. Morton RL, Tong A, Howard K, Snelling P, Webster AC.** The views of patients and carers in  
26 treatment decision making for chronic kidney disease: systematic review and thematic synthesis of  
27 qualitative studies. *BMJ* 2010;340:c112.
- 28 **24. O'Neill T, Jinks C, Ong BN.** Decision-making regarding total knee replacement surgery: a  
29 qualitative meta-synthesis. *BMC Health Serv Res* 2007;7:52.
- 30 **25. Davies E, Yeoh KW.** Internet chemotherapy information: impact on patients and health  
31 professionals. *Br J Cancer* 2012;106-4:651-657.
- 32 **26. Xie B.** Older adults' health information wants in the internet age: implications for patient-provider  
33 relationships. *J Health Commun* 2009;14-6:510-524.
- 34 **27. Stacey D, Bennett CL, Barry MJ, Col NF, Eden KB, Holmes-Rovner M, Llewellyn-Thomas**  
35 **H, Lyddiatt A, Légaré F, Thomson R.** Decision aids for people facing health treatment or screening  
36 decisions. *Cochrane Database Syst Rev* 2011-10:CD001431.
- 37 **28. Hudak PL, Clark SJ, Raymond G.** The Omni-Relevance of Surgery: How Medical  
38 Specialization Shapes Orthopedic Surgeons' Treatment Recommendations. *Health Commun* 2012.
- 39 **29. Hudak PL, Clark SJ, Raymond G.** How surgeons design treatment recommendations in  
40 orthopaedic surgery. *Soc Sci Med* 2011;73-7:1028-36.
- 41 **30. Rapley T.** Distributed decision making: the anatomy of decisions-in-action. *Sociol Health Illn*  
42 2008;30-3:429-44.
- 43 **31. Smith R.** All changed, changed utterly. British medicine will be transformed by the Bristol case.  
44 *BMJ* 1998;316-7149:1917-8.
- 45 **32. No Authors Listed.** [http://www.gmc-](http://www.gmc-uk.org/guidance/good_medical_practice/duties_of_a_doctor.asp)  
46 [uk.org/guidance/good\\_medical\\_practice/duties\\_of\\_a\\_doctor.asp](http://www.gmc-uk.org/guidance/good_medical_practice/duties_of_a_doctor.asp) (accessed Jan 2013).
- 47 **33. No Authors Listed.** Revalidation: what you need to do. General Medical Council, 2012.
- 48 **34. No Authors Listed.** Public and Patient Guide to the NJR Annual Report 2012.  
49 <http://www.njrcentre.org.uk>, 2012.
- 50 **35. Hill M.** <http://www.bbc.co.uk/news/health-20584897> (accessed Jan 2013).
- 51 **36. Impicciatore P, Pandolfini C, Casella N, Bonati M.** Reliability of health information for the  
52 public on the World Wide Web: systematic survey of advice on managing fever in children at home.  
53 *BMJ* 1997;314-7098:1875-1879.
- 54 **37. Smith JT, Pate OL, Guss D, Lee JT, Chiodo CP, Bluman EM.** Internet information quality for  
55 ten common foot and ankle diagnoses. *Foot Ankle Surg* 2012;18-3:198-202.
- 56 **38. Preece J.** Emphatic communities: balancing emotional and factual communication. *Interacting*  
57 *with Computers* 1999;12-1:63-77.  
58  
59  
60

1  
2  
3 **39. van Uden-Kraan CF, Drossaert CH, Taal E, Seydel ER, van de Laar MA.** Participation in  
4 online patient support groups endorses patients' empowerment. *Patient Educ Couns* 2009;74-1:61-9.

5 **40. McKinlay J.** Social Networks, Lay Consultation and Help-Seeking Behavior. *Social Forces*  
6 1973;51-3:275-292.

7 **41. Goldberg AJ, Sharp RJ, Cooke P.** Ankle replacement: current practice of foot & ankle surgeons  
8 in the United kingdom. *Foot Ankle Int* 2009;30-10:950-954.  
9

10  
11  
12  
13  
14  
15  
16  
17  
18  
19  
20  
21  
22  
23  
24  
25  
26  
27  
28  
29  
30  
31  
32  
33  
34  
35  
36  
37  
38  
39  
40  
41  
42  
43  
44  
45  
46  
47  
48  
49  
50  
51  
52  
53  
54  
55  
56  
57  
58  
59  
60

For peer review only

## Consolidated criteria for reporting qualitative studies (COREQ): 32-item checklist

Developed from:

Tong A, Sainsbury P, Craig J. Consolidated criteria for reporting qualitative research (COREQ): a 32-item checklist for interviews and focus groups. *International Journal for Quality in Health Care*. 2007. Volume 19, Number 6: pp. 349 – 357

**YOU MUST PROVIDE A RESPONSE FOR ALL ITEMS. ENTER N/A IF NOT APPLICABLE**

| No. Item                                       | Guide questions/description                                                                                                                              | Reported on Page # |
|------------------------------------------------|----------------------------------------------------------------------------------------------------------------------------------------------------------|--------------------|
| <b>Domain 1: Research team and reflexivity</b> |                                                                                                                                                          |                    |
| <i>Personal Characteristics</i>                |                                                                                                                                                          |                    |
| 1. Interviewer/facilitator                     | Which author/s conducted the interview or focus group?                                                                                                   | 7                  |
| 2. Credentials                                 | What were the researcher's credentials?<br>E.g. PhD, MD                                                                                                  | 1                  |
| 3. Occupation                                  | What was their occupation at the time of the study?                                                                                                      | 1                  |
| 4. Gender                                      | Was the researcher male or female?                                                                                                                       | 1                  |
| 5. Experience and training                     | What experience or training did the researcher have?                                                                                                     | n/a                |
| <i>Relationship with participants</i>          |                                                                                                                                                          |                    |
| 6. Relationship established                    | Was a relationship established prior to study commencement?                                                                                              | 7                  |
| 7. Participant knowledge of the interviewer    | What did the participants know about the researcher? e.g. personal goals, reasons for doing the research                                                 | 7                  |
| 8. Interviewer characteristics                 | What characteristics were reported about the interviewer/facilitator? e.g. Bias, assumptions, reasons and interests in the research topic                | 1 and 7            |
| <b>Domain 2: study design</b>                  |                                                                                                                                                          |                    |
| <i>Theoretical framework</i>                   |                                                                                                                                                          |                    |
| 9. Methodological orientation and Theory       | What methodological orientation was stated to underpin the study? e.g. grounded theory, discourse analysis, ethnography, phenomenology, content analysis | 6                  |
| <i>Participant selection</i>                   |                                                                                                                                                          |                    |
| 10. Sampling                                   | How were participants selected? e.g. purposive, convenience, consecutive, snowball                                                                       | 6                  |
| 11. Method of approach                         | How were participants approached? e.g. face-to-face, telephone, mail, email                                                                              | 6                  |
| 12. Sample size                                | How many participants were in the study?                                                                                                                 | 8                  |

|                                        |                                                                                                                                 |                    |
|----------------------------------------|---------------------------------------------------------------------------------------------------------------------------------|--------------------|
| 13. Non-participation                  | How many people refused to participate or dropped out? Reasons?                                                                 | 7, none            |
| <i>Setting</i>                         |                                                                                                                                 |                    |
| 14. Setting of data collection         | Where was the data collected? e.g. home, clinic, workplace                                                                      | 7                  |
| 15. Presence of non-participants       | Was anyone else present besides the participants and researchers?                                                               | n/a                |
| 16. Description of sample              | What are the important characteristics of the sample? e.g. demographic data, date                                               | 8                  |
| <i>Data collection</i>                 |                                                                                                                                 |                    |
| 17. Interview guide                    | Were questions, prompts, guides provided by the authors? Was it pilot tested?                                                   | 17                 |
| 18. Repeat interviews                  | Were repeat inter views carried out? If yes, how many?                                                                          | n/a                |
| 19. Audio/visual recording             | Did the research use audio or visual recording to collect the data?                                                             | 8 -audio           |
| 20. Field notes                        | Were field notes made during and/or after the inter view or focus group?                                                        | n/a                |
| 21. Duration                           | What was the duration of the inter views or focus group?                                                                        | 8                  |
| 22. Data saturation                    | Was data saturation discussed?                                                                                                  | 7                  |
| 23. Transcripts returned               | Were transcripts returned to participants for comment and/or correction?                                                        | no                 |
| <b>Domain 3: analysis and findings</b> |                                                                                                                                 |                    |
| <i>Data analysis</i>                   |                                                                                                                                 |                    |
| 24. Number of data coders              | How many data coders coded the data?                                                                                            | 8                  |
| 25. Description of the coding tree     | Did authors provide a description of the coding tree?                                                                           | no                 |
| 26. Derivation of themes               | Were themes identified in advance or derived from the data?                                                                     | no                 |
| 27. Software                           | What software, if applicable, was used to manage the data?                                                                      | none               |
| 28. Participant checking               | Did participants provide feedback on the findings?                                                                              | no                 |
| <i>Reporting</i>                       |                                                                                                                                 |                    |
| 29. Quotations presented               | Were participant quotations presented to illustrate the themes/findings? Was each quotation identified? e.g. participant number | Please see results |
| 30. Data and findings consistent       | Was there consistency between the data presented and the findings?                                                              | See results        |
| 31. Clarity of major themes            | Were major themes clearly presented in the findings?                                                                            | Results            |
| 32. Clarity of minor themes            | Is there a description of diverse cases or discussion of minor themes?                                                          | n/a                |

Once you have completed this checklist, please save a copy and upload it as part of your submission. When requested to do so as part of the upload process, please select the file type: *Checklist*. You will NOT be able to proceed with

1  
2  
3  
4  
5  
6  
7  
8  
9  
10  
11  
12  
13  
14  
15  
16  
17  
18  
19  
20  
21  
22  
23  
24  
25  
26  
27  
28  
29  
30  
31  
32  
33  
34  
35  
36  
37  
38  
39  
40  
41  
42  
43  
44  
45  
46  
47  
48  
49  
50  
51  
52  
53  
54  
55  
56  
57  
58  
59  
60

**submission unless the checklist has been uploaded. Please DO NOT include this checklist as part of the main manuscript document. It must be uploaded as a separate file.**

For peer review only
